# Supplementary material for: Iodine-induced electrical conductivity of novel columnar lanthanide metal–organic frameworks based on a butterfly-shaped π-extended tetrathiafulvalene ligand
Source: Royal Society of Chemistry journal article supplement (doi:10.1039/d2ma00606e), 2022-01-01
Supplement: d2ma00606e1.pdf [file d2ma00606e1.pdf]

## Iodine-induced electrical conductivity of novel columnar lanthanide metal–organic frameworks based on a butterfly-shaped $\pi$ -extended tetrathiafulvalene ligand

Monica A. Gordillo,<sup>a</sup> Paola A. Benavides,<sup>a</sup> Colin McMillen,<sup>a</sup> and Sourav Saha,<sup>\*a</sup>

<sup>a</sup>Department of Chemistry, Clemson University, 211 S. Palmetto Blvd, Clemson, SC 29643, USA

\*Email: [souravs@clemson.edu](mailto:souravs@clemson.edu)

### SUPPORTING INFORMATION

#### Experimental Section

##### General Materials and Methods

Reagents, starting materials, and solvents were purchased from Sigma-Aldrich, Acros Organic, TCI America and EMD Chemicals and used as received. Ag-paint was procured from Ted Pella. The electrodes (Ag/AgCl, Pt-mesh, Pt-disk, and glassy-carbon disc) and electrochemical cells were procured from BASi.

The single crystal X-ray diffraction (SXRD) data were collected on a Bruker D8 Venture dual source diffractometer equipped with Cu and Mo radiation sources and CMOS detector. The isostructural Ln-MOF structures were solved and refined by using Bruker SHELXTL software package. The powder X-ray diffraction (PXRD) pattern of Tb-MOF crystals were recorded on a Rigaku Ultima IV X-ray diffractometer equipped with Cu  $K\alpha$  radiation source ( $\lambda = 1.5406 \text{ \AA}$ ) and a CCD area detector.

The thermogravimetric analysis (TGA) was conducted under  $N_2$  atmosphere using an SDT Q600 instrument.

A Shimadzu UV-2600 spectrophotometer equipped with an integrated sphere (200–1100 nm range) was used to measure the diffuse-reflectance spectra of the pristine and iodine-treated MOFs. The optical band-gaps were determined from Tauc plots.

Electrochemical measurements of Tb-MOFs were conducted on a Princeton Applied Research VersaStat 3-450 instrument using a glassy carbon working electrode, Ag/AgCl reference electrode, Pt-mesh counter electrode, and a 0.1 M  $Bu_4NPF_6$  in MeCN as supporting electrolyte. The pastes of pristine and iodine-treated Tb-MOF made in MeCN were mounted onto the glassy carbon electrode surface to record their solid-state cyclic voltammograms.

The solid- state EPR spectra of pristine and iodine-treated Tb-MOF were recorded on a Bruker EMX EPR X-band spectrometer at room temperature. Powdered samples of each freshly prepared and air-exposed were inserted into precision-bore 4 mm quartz tube, and the sample weight and height were measured in order to determine the amount and volume. The spin was quantified by performing double integration of the obtained spectrum using the following equation, as described in the literature.<sup>S1</sup>

$$n_s = \frac{DI}{\frac{c}{f(B_1, B_m)} \times \{G_R \times C_t \times n\} \times \{\sqrt{P} \times B_m \times Q \times n_B \times S(S + 1)\}}$$

where,  $c$  = point sample calibration factor;  $B_1$  = microwave magnetic field;  $B_m$  = modulation amplitude;  $G_R$  = the receiver gain,  $C_t$  = conversion time;  $n$  = number of scans;  $P$  = microwave power;  $Q$  = quality factor of the resonator;  $n_B$  = Boltzmann temperature correction;  $S$  = electronic spin; and  $n_s$  = absolute number of spins.

The current-voltage ( $I$ - $V$ ) relationships of pristine and iodine-treated Tb-MOF pellets sandwiched between two Ag-coated stainless-steel electrodes were recorded under ambient conditions between  $-1$  to  $+1$  V using a Keithley 2400 source-meter. To prepare pristine and iodine-treated MOF pellets for  $dc$ -sweep measurements, 2.5 mg of respective material was placed inside a Teflon tube (inner diameter 2.7 mm) capped on one side with a snugly fit stainless-steel rod (diameter 2.7 mm) with conductive silver-coated tip. Then the other end of the Teflon tube was capped with another identical stainless-steel rod with conductive silver-coated tip. Finally, the entire setup containing the MOF material, sandwiched between the two rods, was pressed under 200 MPa pressure using a digital Parr Pellet Press. The thickness of the resulting pellets (ca. 0.2 mm) was measured by a digital caliper from the difference in total length of the two steel rods with and without the sandwiched materials. The resistance of each device was extracted from the slope of the linear  $I$ - $V$  plot and the corresponding conductivity was calculated using the equation  $\sigma = L/RA$ ; where  $\sigma$  = conductivity,  $L$  = thickness of the pellet,  $R$  = resistance of the pellet, and  $A$  = area of the pellet ( $\pi r^2$ ,  $r$  = pellet radius = 1.35 mm).<sup>S1-S3</sup>

**Synthesis of Ln-MOFs (Ln= Tb<sup>3+</sup>, Eu<sup>3+</sup> and Er<sup>3+</sup>).** To a solution of ExTTFTB ligand<sup>S4</sup> (8.6 mg, 0.010 mmol) in DMF (1.0 mL) placed in a screw-capped vial, a separately prepared solution of Ln(NO<sub>3</sub>)<sub>3</sub>•5H<sub>2</sub>O (0.0135 mmol) in a 2:1 DMF/H<sub>2</sub>O mixture (1.5 mL) was added slowly to prevent rapid precipitation. To the resulting solution, 0.1 mL of TFA and 1 mL of chlorobenzene were added immediately. This reaction mixture was then heated at 65 °C for 72 h to obtain dark orange to red-colored crystals suitable for SXRD analysis. The crystalline material was washed thoroughly with DMF, then subjected to solvent exchange with EtOH, and finally dried under vacuum for 48 h. to obtain the bulk materials as crystalline dark orange to red-colored powders.

**Iodine-Treated Tb-MOF.** The dark orange colored evacuated Tb-MOF powder (20 mg) placed in small open vial was placed inside a larger screw-capped vial containing a few iodine chips. The larger vial was capped tightly and sealed with a parafilm tape to expose the MOF crystals to iodine vapor for 4 days, which turned the MOF powder brown. The iodine-treated Tb-MOF was then washed thoroughly with hexanes and kept under vacuum to remove any physisorbed iodide.

#### Supplementary Figures:

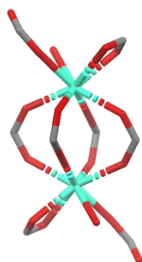

**Fig. S1.** Tb-MOF secondary building unit, showing the 8-coordinated environment of Tb ions (C, gray, O, red; and Tb, cyan).

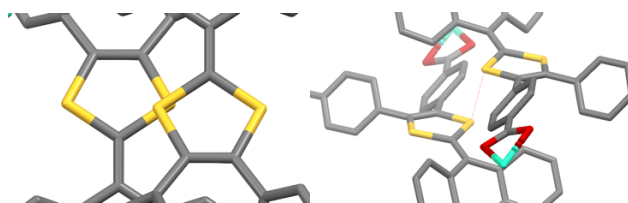

**Fig. S2.** A section of SXRD structure shows the lack of  $\pi$ - $\pi$ -overlap between the 1,3-dithiolene rings of ExTTFTB ligands in Ln-MOFs.

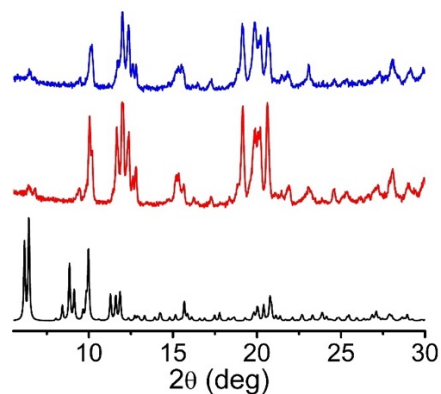

**Fig. S3.** The experimental PXRD patterns of pristine (red) and iodine-treated (blue) Tb-MOF. The simulated pattern of Tb-MOF is shown at the bottom (black).

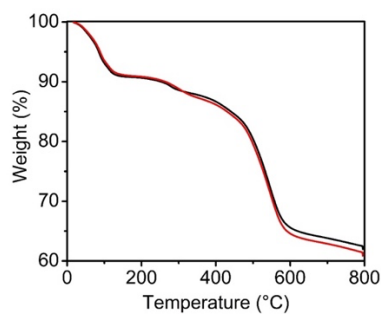

**Fig. S4.** The TGA profile of pristine (black) and iodine-treated (red) Tb-MOF.

#### References:

- S1. S. Zhang, D. K. Panda, A. Yadav, W. Zhou and S. Saha, *Chem. Sci.*, 2021, **12**, 13379–13391.
- S2. D. K. Panda, K. Maity, A. Palukoshka, F. Ibrahim and S. Saha, *ACS Sus. Chem. Eng.* 2019, **7**, 4619–4624.
- S3. Z. Hao, G. Yang, X. Song, M. Zhu, X. Meng, S. Zhao, S. Song and H. Zhang, *J. Mater. Chem. A* **2014**, *2*, 237–244.
- S4. M. A. Gordillo, P. A. Benavides, D. K. Panda and S. Saha, *ACS Appl. Mater. Interfaces*, 2020, **12**, 12955–12961.

### Crystal Structure Report for [Tb(C<sub>48</sub>H<sub>25</sub>O<sub>8</sub>S<sub>4</sub>)(H<sub>2</sub>O)]<sub>n</sub>·2C<sub>3</sub>H<sub>7</sub>NO, 0.5 H<sub>2</sub>O

A specimen of C<sub>54</sub>H<sub>42</sub>N<sub>2</sub>O<sub>11.50</sub>S<sub>4</sub>Tb, approximate dimensions 0.098 mm x 0.241 mm x 0.279 mm, was used for the X-ray crystallographic analysis. The X-ray intensity data were measured. The integration of the data using a triclinic unit cell yielded a total of 143920 reflections to a maximum  $\theta$  angle of 29.15° (0.73 Å resolution), of which 17184 were independent (average redundancy 8.375, completeness = 99.7%,  $R_{\text{int}} = 3.59\%$ ,  $R_{\text{sig}} = 2.13\%$ ) and 15470 (90.03%) were greater than  $2\sigma(F^2)$ . The final cell constants of  $\underline{a} = 11.6881(7)$  Å,  $\underline{b} = 16.0699(10)$  Å,  $\underline{c} = 19.7107(12)$  Å,  $\alpha = 66.845(2)^\circ$ ,  $\beta = 76.074(2)^\circ$ ,  $\gamma = 71.653(2)^\circ$ , volume = 3201.8(3) Å<sup>3</sup>, are based upon the refinement of the XYZ-centroids of reflections above 20  $\sigma(I)$ . The calculated minimum and maximum transmission coefficients (based on crystal size) are 0.8937 and 1.0000.

The structure was solved and refined using the Bruker SHELXTL Software Package, using the space group P -1, with  $Z = 2$  for the formula unit, C<sub>54</sub>H<sub>42</sub>N<sub>2</sub>O<sub>11.50</sub>S<sub>4</sub>Tb. The final anisotropic full-matrix least-squares refinement on  $F^2$  with 802 variables converged at  $R1 = 4.89\%$ , for the observed data and  $wR2 = 15.60\%$  for all data. The goodness-of-fit was 1.074. The largest peak in the final difference electron density synthesis was 2.750 e<sup>-</sup>/Å<sup>3</sup> and the largest hole was -0.934 e<sup>-</sup>/Å<sup>3</sup> with an RMS deviation of 0.166 e<sup>-</sup>/Å<sup>3</sup>. On the basis of the final model, the calculated density was 1.234 g/cm<sup>3</sup> and  $F(000)$ , 1202 e<sup>-</sup>.

### Crystal Structure Report for [Er(C<sub>48</sub>H<sub>25</sub>O<sub>8</sub>S<sub>4</sub>)(H<sub>2</sub>O)]<sub>n</sub>·2C<sub>3</sub>H<sub>7</sub>NO, H<sub>2</sub>O

A specimen of C<sub>54</sub>H<sub>43</sub>ErN<sub>2</sub>O<sub>12</sub>S<sub>4</sub>, approximate dimensions 0.051 mm x 0.064 mm x 0.081 mm, was used for the X-ray crystallographic analysis. The X-ray intensity data were measured. The frames were integrated with the Bruker SAINT software package using a narrow-frame algorithm. The integration of the data using a triclinic unit cell yielded a total of 111398 reflections to a maximum  $\theta$  angle of 28.31° (0.75 Å resolution), of which 15744 were independent (average redundancy 7.076, completeness = 99.6%,  $R_{\text{int}} = 2.78\%$ ,  $R_{\text{sig}} = 1.60\%$ ) and 15000 (95.27%) were greater than  $2\sigma(F^2)$ . The final cell constants of  $\underline{a} = 11.6009(10)$  Å,  $\underline{b} = 16.1085(14)$  Å,  $\underline{c} = 19.5975(17)$  Å,  $\alpha = 66.704(3)^\circ$ ,  $\beta = 76.136(3)^\circ$ ,  $\gamma = 72.168(3)^\circ$ , volume = 3172.5(5) Å<sup>3</sup>, are based upon the refinement of the XYZ-centroids of 9241 reflections above 20  $\sigma(I)$  with  $5.469^\circ < 2\theta < 56.60^\circ$ . Data were corrected for absorption effects using the Multi-Scan method (SADABS). The ratio of minimum to maximum apparent transmission was 0.931. The calculated minimum and maximum transmission coefficients (based on crystal size) are 0.9313 and 1.0000.

The structure was solved and refined using the Bruker SHELXTL Software Package, using the space group P -1, with  $Z = 2$  for the formula unit, C<sub>54</sub>H<sub>43</sub>ErN<sub>2</sub>O<sub>12</sub>S<sub>4</sub>. The final anisotropic full-matrix least-squares refinement on  $F^2$  with 808 variables converged at  $R1 = 4.66\%$ , for the observed data and  $wR2 = 14.92\%$  for all data. The goodness-of-fit was 1.096. The largest peak in the final difference electron density synthesis was 2.233 e<sup>-</sup>/Å<sup>3</sup> and the largest hole was -1.274 e<sup>-</sup>/Å<sup>3</sup> with an RMS deviation of 0.165 e<sup>-</sup>/Å<sup>3</sup>. On the basis of the final model, the calculated density was 1.264 g/cm<sup>3</sup> and  $F(000)$ , 1218 e<sup>-</sup>.

### Crystal Structure Report for [Eu(C<sub>48</sub>H<sub>25</sub>O<sub>8</sub>S<sub>4</sub>)(H<sub>2</sub>O)]<sub>n</sub>·2C<sub>3</sub>H<sub>7</sub>NO, 1.25 H<sub>2</sub>O

A specimen of C<sub>54</sub>H<sub>43.50</sub>EuN<sub>2</sub>O<sub>12.25</sub>S<sub>4</sub>, approximate dimensions 0.170 mm x 0.180 mm x 0.220 mm, was used for the X-ray crystallographic analysis. The X-ray intensity data were measured. The integration of the data using a triclinic unit cell yielded a total of 105127 reflections to a maximum  $\theta$  angle of 28.34° (0.75 Å resolution), of which 15974 were independent (average redundancy 6.581, completeness = 99.5%,  $R_{\text{int}} = 3.21\%$ ,  $R_{\text{sig}} = 2.17\%$ ) and 14485 (90.68%) were greater than  $2\sigma(F^2)$ . The final cell constants of  $\underline{a} = 11.6915(6)$  Å,  $\underline{b} = 16.0431(8)$  Å,  $\underline{c} = 19.7816(10)$  Å,  $\alpha = 66.8521(13)^\circ$ ,  $\beta = 76.8187(14)^\circ$ ,  $\gamma = 71.4086(14)^\circ$ , volume = 3211.1(3) Å<sup>3</sup>, are based upon the refinement of the XYZ-centroids of reflections above 20  $\sigma(I)$ .

The calculated minimum and maximum transmission coefficients (based on crystal size) are 0.9409 and 1.0000.

The structure was solved and refined using the Bruker SHELXTL Software Package, using the space group P -1, with Z = 2 for the formula unit, C<sub>54</sub>H<sub>43.50</sub>EuN<sub>2</sub>O<sub>12.25</sub>S<sub>4</sub>. The final anisotropic full-matrix least-squares refinement on F<sup>2</sup> with 808 variables converged at R1 = 5.08%, for the observed data and wR2 = 15.64% for all data. The goodness-of-fit was 1.119. The largest peak in the final difference electron density synthesis was 2.856 e<sup>-</sup>/Å<sup>3</sup> and the largest hole was -1.624 e<sup>-</sup>/Å<sup>3</sup> with an RMS deviation of 0.165 e<sup>-</sup>/Å<sup>3</sup>. On the basis of the final model, the calculated density was 1.238 g/cm<sup>3</sup> and F(000), 1213 e<sup>-</sup>.

The geometry of the Ln(III) ions in each MOF were calculated using SHAPE 2.1 software, which revealed that the Tb(III) and Er(III) ions have distorted biaugmented trigonal prisms J50 geometry, whereas Eu(III) ions have distorted heptagonal pyramid geometry.

**Table S1. Sample and crystal data for Tb-MOF.**

|                               |                                                                                     |                |
|-------------------------------|-------------------------------------------------------------------------------------|----------------|
| <b>Chemical formula</b>       | C <sub>54</sub> H <sub>42</sub> N <sub>2</sub> O <sub>11.50</sub> S <sub>4</sub> Tb |                |
| <b>Formula weight</b>         | 1190.05 g/mol                                                                       |                |
| <b>Temperature</b>            | 150(2) K                                                                            |                |
| <b>Wavelength</b>             | 0.71073 Å                                                                           |                |
| <b>Crystal size</b>           | 0.098 x 0.241 x 0.279 mm                                                            |                |
| <b>Crystal system</b>         | triclinic                                                                           |                |
| <b>Space group</b>            | P -1                                                                                |                |
| <b>Unit cell dimensions</b>   | a = 11.6881(7) Å                                                                    | α = 66.845(2)° |
|                               | b = 16.0699(10) Å                                                                   | β = 76.074(2)° |
|                               | c = 19.7107(12) Å                                                                   | γ = 71.653(2)° |
| <b>Volume</b>                 | 3201.8(3) Å <sup>3</sup>                                                            |                |
| <b>Z</b>                      | 2                                                                                   |                |
| <b>Density (calculated)</b>   | 1.234 g/cm <sup>3</sup>                                                             |                |
| <b>Absorption coefficient</b> | 1.286 mm <sup>-1</sup>                                                              |                |
| <b>F(000)</b>                 | 1202                                                                                |                |

**Table S2. Data collection and structure refinement for Tb-MOF.**

|                                        |                |
|----------------------------------------|----------------|
| <b>Theta range for data collection</b> | 3.12 to 29.15° |
|----------------------------------------|----------------|

|                                         |                                                                                                                         |
|-----------------------------------------|-------------------------------------------------------------------------------------------------------------------------|
| <b>Index ranges</b>                     | -16<=h<=16, -22<=k<=21, -<br>27<=l<=26                                                                                  |
| <b>Reflections collected</b>            | 143920                                                                                                                  |
| <b>Independent reflections</b>          | 17184 [R(int) = 0.0359]                                                                                                 |
| <b>Max. and min. transmission</b>       | 1.0000 and 0.8937                                                                                                       |
| <b>Structure solution technique</b>     | direct methods                                                                                                          |
| <b>Structure solution program</b>       | SHELXT 2014/5 (Sheldrick, 2014)                                                                                         |
| <b>Refinement method</b>                | Full-matrix least-squares on F <sup>2</sup>                                                                             |
| <b>Refinement program</b>               | SHELXL-2016/6 (Sheldrick, 2016)                                                                                         |
| <b>Function minimized</b>               | $\Sigma w(F_o^2 - F_c^2)^2$                                                                                             |
| <b>Data / restraints / parameters</b>   | 17184 / 246 / 802                                                                                                       |
| <b>Goodness-of-fit on F<sup>2</sup></b> | 1.074                                                                                                                   |
| <b>Final R indices</b>                  | 15470<br>data; R1 = 0.0489, wR2 = 0.1495<br>I>2 $\sigma$ (I)                                                            |
|                                         | all data R1 = 0.0552, wR2 = 0.1560                                                                                      |
| <b>Weighting scheme</b>                 | w=1/[ $\sigma^2(F_o^2)+(0.0954P)^2+9.4107P$ ]<br>where P=(F <sub>o</sub> <sup>2</sup> +2F <sub>c</sub> <sup>2</sup> )/3 |
| <b>Largest diff. peak and hole</b>      | 2.750 and -0.934 eÅ <sup>-3</sup>                                                                                       |
| <b>R.M.S. deviation from mean</b>       | 0.166 eÅ <sup>-3</sup>                                                                                                  |

**Table S3. Atomic coordinates and equivalent isotropic atomic displacement parameters (Å<sup>2</sup>) for Tb-MOF.**

U(eq) is defined as one third of the trace of the orthogonalized U<sub>ij</sub> tensor.

|     | x/a        | y/b        | z/c        | U(eq)       |
|-----|------------|------------|------------|-------------|
| Tb1 | 0.05113(2) | 0.11463(2) | 0.99530(2) | 0.01961(7)  |
| S1  | 0.24622(9) | 0.15109(9) | 0.42944(7) | 0.0334(2)   |
| S2  | 0.51060(9) | 0.09397(7) | 0.41110(5) | 0.02603(19) |
| S3  | 0.26795(8) | 0.53564(6) | 0.42138(5) | 0.02253(17) |

|     | <b>x/a</b> | <b>y/b</b> | <b>z/c</b>  | <b>U(eq)</b> |
|-----|------------|------------|-------------|--------------|
| S4  | 0.53297(8) | 0.47824(6) | 0.41171(5)  | 0.02271(17)  |
| O1  | 0.0489(4)  | 0.1829(4)  | 0.0785(3)   | 0.0638(13)   |
| O2  | 0.9535(11) | 0.3029(7)  | 0.0998(7)   | 0.204(6)     |
| O3  | 0.8036(3)  | 0.9740(2)  | 0.07298(17) | 0.0316(6)    |
| O4  | 0.8834(3)  | 0.0789(3)  | 0.0811(2)   | 0.0408(8)    |
| O5  | 0.0632(3)  | 0.9110(3)  | 0.07152(17) | 0.0403(8)    |
| O6  | 0.1620(3)  | 0.9946(2)  | 0.08996(17) | 0.0373(7)    |
| O7  | 0.7636(3)  | 0.8219(3)  | 0.04544(18) | 0.0400(8)    |
| O8  | 0.8985(3)  | 0.7701(3)  | 0.1222(2)   | 0.0639(14)   |
| O9W | 0.8897(6)  | 0.2617(4)  | 0.9786(4)   | 0.096(2)     |
| C1  | 0.0325(7)  | 0.2313(6)  | 0.1127(5)   | 0.085(3)     |
| C2  | 0.1025(6)  | 0.2069(5)  | 0.1738(4)   | 0.064(2)     |
| C3  | 0.1800(5)  | 0.1208(4)  | 0.1956(3)   | 0.0434(12)   |
| C4  | 0.2481(5)  | 0.0937(4)  | 0.2530(3)   | 0.0403(10)   |
| C5  | 0.2404(4)  | 0.1548(3)  | 0.2887(3)   | 0.0358(10)   |
| C6  | 0.1622(7)  | 0.2430(6)  | 0.2656(5)   | 0.087(3)     |
| C7  | 0.0945(9)  | 0.2688(6)  | 0.2096(6)   | 0.107(4)     |
| C8  | 0.3185(4)  | 0.1318(3)  | 0.3455(2)   | 0.0296(8)    |
| C9  | 0.4402(4)  | 0.1033(3)  | 0.3383(2)   | 0.0268(7)    |
| C10 | 0.5268(3)  | 0.0854(3)  | 0.2740(2)   | 0.0252(7)    |
| C11 | 0.5594(4)  | 0.9994(3)  | 0.2656(3)   | 0.0375(10)   |
| C12 | 0.6469(4)  | 0.9825(3)  | 0.2069(3)   | 0.0355(9)    |
| C13 | 0.7046(3)  | 0.0516(3)  | 0.1591(2)   | 0.0262(7)    |
| C14 | 0.6735(5)  | 0.1366(3)  | 0.1686(3)   | 0.0383(10)   |
| C15 | 0.5834(5)  | 0.1544(3)  | 0.2248(3)   | 0.0366(10)   |
| C16 | 0.8057(4)  | 0.0328(3)  | 0.0988(2)   | 0.0287(8)    |

|     | <b>x/a</b> | <b>y/b</b> | <b>z/c</b>  | <b>U(eq)</b> |
|-----|------------|------------|-------------|--------------|
| C17 | 0.3789(3)  | 0.1488(3)  | 0.4582(2)   | 0.0237(7)    |
| C18 | 0.3809(3)  | 0.1895(2)  | 0.5055(2)   | 0.0225(7)    |
| C19 | 0.4945(3)  | 0.1952(2)  | 0.5217(2)   | 0.0220(7)    |
| C20 | 0.5972(4)  | 0.1201(3)  | 0.5358(2)   | 0.0279(8)    |
| C21 | 0.7014(4)  | 0.1306(3)  | 0.5499(3)   | 0.0321(8)    |
| C22 | 0.7048(4)  | 0.2155(3)  | 0.5508(2)   | 0.0310(8)    |
| C23 | 0.6034(4)  | 0.2911(3)  | 0.5370(2)   | 0.0254(7)    |
| C24 | 0.4986(3)  | 0.2822(2)  | 0.52164(19) | 0.0204(6)    |
| C25 | 0.3890(3)  | 0.3598(2)  | 0.50359(19) | 0.0189(6)    |
| C26 | 0.2732(3)  | 0.3322(2)  | 0.53519(19) | 0.0199(6)    |
| C27 | 0.2698(4)  | 0.2441(3)  | 0.5377(2)   | 0.0236(7)    |
| C28 | 0.1640(4)  | 0.2129(3)  | 0.5695(2)   | 0.0317(9)    |
| C29 | 0.0622(4)  | 0.2675(4)  | 0.5991(3)   | 0.0377(10)   |
| C30 | 0.0658(4)  | 0.3539(3)  | 0.5967(3)   | 0.0334(9)    |
| C31 | 0.1703(3)  | 0.3866(3)  | 0.5648(2)   | 0.0251(7)    |
| C32 | 0.3958(3)  | 0.4458(2)  | 0.45485(19) | 0.0193(6)    |
| C33 | 0.3496(3)  | 0.6031(2)  | 0.3433(2)   | 0.0215(6)    |
| C34 | 0.4711(3)  | 0.5767(2)  | 0.3390(2)   | 0.0212(6)    |
| C35 | 0.2806(3)  | 0.6859(3)  | 0.28948(19) | 0.0219(7)    |
| C36 | 0.3053(4)  | 0.7725(3)  | 0.2702(2)   | 0.0284(8)    |
| C37 | 0.2540(4)  | 0.8481(3)  | 0.2124(2)   | 0.0274(8)    |
| C38 | 0.1761(3)  | 0.8392(3)  | 0.1741(2)   | 0.0241(7)    |
| C39 | 0.1443(4)  | 0.7543(3)  | 0.1964(2)   | 0.0285(8)    |
| C40 | 0.1969(3)  | 0.6787(3)  | 0.2537(2)   | 0.0250(7)    |
| C41 | 0.1301(4)  | 0.9194(3)  | 0.1076(2)   | 0.0296(8)    |
| C42 | 0.5582(3)  | 0.6234(3)  | 0.2796(2)   | 0.0245(7)    |



|      | <b>x/a</b> | <b>y/b</b> | <b>z/c</b> | <b>U(eq)</b> |
|------|------------|------------|------------|--------------|
| C43  | 0.5464(4)  | 0.6496(4)  | 0.2047(2)  | 0.0362(10)   |
| C44  | 0.6233(4)  | 0.6992(4)  | 0.1497(2)  | 0.0375(10)   |
| C45  | 0.7157(4)  | 0.7197(3)  | 0.1685(2)  | 0.0299(8)    |
| C46  | 0.7302(4)  | 0.6912(3)  | 0.2423(3)  | 0.0361(10)   |
| C47  | 0.6515(4)  | 0.6439(3)  | 0.2977(2)  | 0.0326(9)    |
| C48  | 0.7979(4)  | 0.7736(3)  | 0.1086(3)  | 0.0351(9)    |
| N49  | 0.9204(7)  | 0.0357(8)  | 0.3410(6)  | 0.057(3)     |
| C50  | 0.9333(12) | 0.0007(9)  | 0.2832(8)  | 0.060(3)     |
| C51  | 0.8473(14) | 0.1305(14) | 0.3342(12) | 0.089(5)     |
| C52  | 0.9661(15) | 0.9976(11) | 0.4026(10) | 0.076(4)     |
| O53  | 0.0227(9)  | 0.9161(9)  | 0.4238(8)  | 0.093(4)     |
| N54  | 0.9558(7)  | 0.4060(6)  | 0.3596(5)  | 0.0377(18)   |
| C55  | 0.8919(16) | 0.3479(12) | 0.4080(11) | 0.086(5)     |
| C57  | 0.9649(15) | 0.4684(11) | 0.2878(9)  | 0.071(4)     |
| C56  | 0.0505(11) | 0.4120(8)  | 0.3838(9)  | 0.064(3)     |
| O58  | 0.0387(19) | 0.5142(13) | 0.2565(12) | 0.158(7)     |
| N59  | 0.5115(15) | 0.2802(9)  | 0.0186(6)  | 0.072(4)     |
| C60  | 0.4083(12) | 0.2415(14) | 0.0625(7)  | 0.073(5)     |
| C62  | 0.6054(12) | 0.2352(9)  | 0.9818(6)  | 0.053(3)     |
| C61  | 0.537(3)   | 0.3547(19) | 0.0202(15) | 0.131(9)     |
| O63  | 0.5956(12) | 0.1669(10) | 0.9765(8)  | 0.095(4)     |
| O10W | 0.5311(9)  | 0.0141(9)  | 0.9319(6)  | 0.029(2)     |
| O11W | 0.4311(10) | 0.0077(11) | 0.9913(8)  | 0.042(3)     |
| C65B | 0.529(3)   | 0.441(2)   | 0.1755(18) | 0.070(3)     |
| O68B | 0.5010(17) | 0.3501(12) | 0.3092(10) | 0.057(2)     |
| C66B | 0.760(2)   | 0.383(2)   | 0.1600(18) | 0.073(4)     |

|      | x/a        | y/b        | z/c        | U(eq)    |
|------|------------|------------|------------|----------|
| C67B | 0.604(2)   | 0.346(2)   | 0.2819(14) | 0.070(3) |
| N64B | 0.637(2)   | 0.3901(18) | 0.2049(13) | 0.072(3) |
| C65A | 0.393(2)   | 0.3713(17) | 0.3043(13) | 0.053(3) |
| C67A | 0.6021(19) | 0.374(2)   | 0.257(2)   | 0.071(3) |
| N64A | 0.4850(18) | 0.3978(16) | 0.2474(12) | 0.068(2) |
| C66A | 0.417(3)   | 0.463(2)   | 0.1887(16) | 0.073(4) |
| O68A | 0.711(2)   | 0.3657(17) | 0.2385(14) | 0.082(3) |

**Table S4. Bond lengths (Å) for Tb-MOF.**

|         |          |         |           |
|---------|----------|---------|-----------|
| Tb1-O1  | 2.296(4) | Tb1-O5  | 2.304(3)  |
| Tb1-O4  | 2.320(3) | Tb1-O3  | 2.368(3)  |
| Tb1-O6  | 2.375(3) | Tb1-O8  | 2.408(3)  |
| Tb1-O9W | 2.476(5) | Tb1-O7  | 2.506(3)  |
| Tb1-C48 | 2.810(4) | Tb1-H9B | 2.4983(2) |
| S1-C17  | 1.760(4) | S1-C8   | 1.765(4)  |
| S2-C9   | 1.755(4) | S2-C17  | 1.764(4)  |
| S3-C33  | 1.757(4) | S3-C32  | 1.767(3)  |
| S4-C34  | 1.754(4) | S4-C32  | 1.756(4)  |
| O1-C1   | 1.163(7) | O2-C1   | 1.207(10) |
| O2-H2   | 0.84     | O3-C16  | 1.244(5)  |
| O4-C16  | 1.250(5) | O5-C41  | 1.243(5)  |
| O6-C41  | 1.269(6) | O7-C48  | 1.264(6)  |
| O8-C48  | 1.246(6) | O9W-H9A | 0.860(5)  |
| O9W-H9B | 0.880(7) | C1-C2   | 1.474(8)  |
| C2-C3   | 1.360(8) | C2-C7   | 1.399(7)  |
| C3-C4   | 1.391(7) | C3-H3   | 0.95      |

|         |          |         |          |
|---------|----------|---------|----------|
| C4-C5   | 1.387(6) | C4-H4   | 0.95     |
| C5-C6   | 1.389(8) | C5-C8   | 1.475(6) |
| C6-C7   | 1.368(9) | C6-H6   | 0.95     |
| C7-H7   | 0.95     | C8-C9   | 1.340(6) |
| C9-C10  | 1.484(5) | C10-C11 | 1.378(6) |
| C10-C15 | 1.383(6) | C11-C12 | 1.400(6) |
| C11-H11 | 0.95     | C12-C13 | 1.385(6) |
| C12-H12 | 0.95     | C13-C14 | 1.374(6) |
| C13-C16 | 1.512(5) | C14-C15 | 1.384(6) |
| C14-H14 | 0.95     | C15-H15 | 0.95     |
| C17-C18 | 1.340(5) | C18-C19 | 1.475(5) |
| C18-C27 | 1.478(5) | C19-C20 | 1.400(5) |
| C19-C24 | 1.414(5) | C20-C21 | 1.386(6) |
| C20-H20 | 0.95     | C21-C22 | 1.385(6) |
| C21-H21 | 0.95     | C22-C23 | 1.395(5) |
| C22-H22 | 0.95     | C23-C24 | 1.391(5) |
| C23-H23 | 0.95     | C24-C25 | 1.479(5) |
| C25-C32 | 1.351(5) | C25-C26 | 1.474(5) |
| C26-C31 | 1.398(5) | C26-C27 | 1.409(5) |
| C27-C28 | 1.394(5) | C28-C29 | 1.392(6) |
| C28-H28 | 0.95     | C29-C30 | 1.385(6) |
| C29-H29 | 0.95     | C30-C31 | 1.391(6) |
| C30-H30 | 0.95     | C31-H31 | 0.95     |
| C33-C34 | 1.340(5) | C33-C35 | 1.474(5) |
| C34-C42 | 1.479(5) | C35-C40 | 1.392(5) |
| C35-C36 | 1.396(5) | C36-C37 | 1.384(5) |
| C36-H36 | 0.95     | C37-C38 | 1.384(5) |

|           |           |           |           |
|-----------|-----------|-----------|-----------|
| C37-H37   | 0.95      | C38-C39   | 1.399(6)  |
| C38-C41   | 1.499(5)  | C39-C40   | 1.384(5)  |
| C39-H39   | 0.95      | C40-H40   | 0.95      |
| C42-C47   | 1.390(5)  | C42-C43   | 1.397(6)  |
| C43-C44   | 1.385(6)  | C43-H43   | 0.95      |
| C44-C45   | 1.387(6)  | C44-H44   | 0.95      |
| C45-C46   | 1.378(6)  | C45-C48   | 1.498(5)  |
| C46-C47   | 1.386(6)  | C46-H46   | 0.95      |
| C47-H47   | 0.95      | N49-C52   | 1.286(19) |
| N49-C50   | 1.418(19) | N49-C51   | 1.46(2)   |
| C50-H50A  | 0.98      | C50-H50B  | 0.98      |
| C50-H50C  | 0.98      | C51-H51A  | 0.98      |
| C51-H51B  | 0.98      | C51-H51C  | 0.98      |
| C52-O53   | 1.218(15) | C52-H52   | 0.95      |
| N54-C55   | 1.317(17) | N54-C56   | 1.350(15) |
| N54-C57   | 1.377(18) | C55-H55A  | 0.98      |
| C55-H55B  | 0.98      | C55-H55C  | 0.98      |
| C57-O58   | 1.206(15) | C57-H57   | 0.95      |
| C56-H56A  | 0.98      | C56-H56B  | 0.98      |
| C56-H56C  | 0.98      | N59-C61   | 1.33(3)   |
| N59-C62   | 1.336(19) | N59-C60   | 1.46(2)   |
| C60-H60A  | 0.98      | C60-H60B  | 0.98      |
| C60-H60C  | 0.98      | C62-O63   | 1.186(14) |
| C62-H62   | 0.95      | C61-H61A  | 0.98      |
| C61-H61B  | 0.98      | C61-H61C  | 0.98      |
| O10W-H10A | 0.948(11) | O10W-H10B | 0.860(11) |
| O11W-H11B | 0.861(17) | O11W-H11A | 0.851(13) |

|           |           |           |           |
|-----------|-----------|-----------|-----------|
| C65B-N64B | 1.386(18) | C65B-H65A | 0.98      |
| C65B-H65B | 0.98      | C65B-H65C | 0.98      |
| O68B-C67B | 1.184(18) | C66B-N64B | 1.495(18) |
| C66B-H66A | 0.98      | C66B-H66B | 0.98      |
| C66B-H66C | 0.98      | C67B-N64B | 1.413(18) |
| C67B-H67B | 0.95      | C65A-N64A | 1.392(18) |
| C65A-H65D | 0.98      | C65A-H65E | 0.98      |
| C65A-H65F | 0.98      | C67A-O68A | 1.219(18) |
| C67A-N64A | 1.338(18) | C67A-H67A | 0.95      |
| N64A-C66A | 1.424(18) | C66A-H66D | 0.98      |
| C66A-H66E | 0.98      | C66A-H66F | 0.98      |

**Table S5. Bond angles (°) for Tb-MOF.**

|            |            |            |            |
|------------|------------|------------|------------|
| O1-Tb1-O5  | 146.04(15) | O1-Tb1-O4  | 78.12(15)  |
| O5-Tb1-O4  | 76.75(12)  | O1-Tb1-O3  | 137.95(15) |
| O5-Tb1-O3  | 76.01(12)  | O4-Tb1-O3  | 130.01(12) |
| O1-Tb1-O6  | 74.76(17)  | O5-Tb1-O6  | 124.08(13) |
| O4-Tb1-O6  | 83.54(13)  | O3-Tb1-O6  | 78.27(12)  |
| O1-Tb1-O8  | 101.99(19) | O5-Tb1-O8  | 83.61(14)  |
| O4-Tb1-O8  | 140.28(14) | O3-Tb1-O8  | 75.96(15)  |
| O6-Tb1-O8  | 135.42(12) | O1-Tb1-O9W | 68.6(2)    |
| O5-Tb1-O9W | 82.3(2)    | O4-Tb1-O9W | 72.76(19)  |
| O3-Tb1-O9W | 141.8(2)   | O6-Tb1-O9W | 139.5(2)   |
| O8-Tb1-O9W | 70.6(2)    | O1-Tb1-O7  | 73.27(14)  |
| O5-Tb1-O7  | 131.02(11) | O4-Tb1-O7  | 151.08(12) |
| O3-Tb1-O7  | 72.76(12)  | O6-Tb1-O7  | 84.97(12)  |
| O8-Tb1-O7  | 52.88(12)  | O9W-Tb1-O7 | 100.13(18) |

|             |            |             |            |
|-------------|------------|-------------|------------|
| O1-Tb1-C48  | 88.73(16)  | O5-Tb1-C48  | 106.89(13) |
| O4-Tb1-C48  | 157.90(14) | O3-Tb1-C48  | 71.13(13)  |
| O6-Tb1-C48  | 110.28(13) | O8-Tb1-C48  | 26.20(13)  |
| O9W-Tb1-C48 | 85.97(18)  | O7-Tb1-C48  | 26.74(13)  |
| O1-Tb1-H9B  | 87.10(14)  | O5-Tb1-H9B  | 62.14(10)  |
| O4-Tb1-H9B  | 66.95(10)  | O3-Tb1-H9B  | 129.92(8)  |
| O6-Tb1-H9B  | 148.11(9)  | O8-Tb1-H9B  | 73.36(9)   |
| O9W-Tb1-H9B | 20.38(17)  | O7-Tb1-H9B  | 115.03(9)  |
| C48-Tb1-H9B | 94.99(9)   | C17-S1-C8   | 96.05(19)  |
| C9-S2-C17   | 96.10(19)  | C33-S3-C32  | 96.02(17)  |
| C34-S4-C32  | 96.25(17)  | C1-O1-Tb1   | 167.3(6)   |
| C1-O2-H2    | 109.5      | C16-O3-Tb1  | 134.9(3)   |
| C16-O4-Tb1  | 142.8(3)   | C41-O5-Tb1  | 175.9(3)   |
| C41-O6-Tb1  | 109.7(3)   | C48-O7-Tb1  | 90.1(3)    |
| C48-O8-Tb1  | 95.2(3)    | Tb1-O9W-H9A | 167.3(7)   |
| Tb1-O9W-H9B | 81.2(3)    | H9A-O9W-H9B | 95.7(7)    |
| O1-C1-O2    | 119.7(7)   | O1-C1-C2    | 122.3(6)   |
| O2-C1-C2    | 118.0(6)   | C3-C2-C7    | 118.4(5)   |
| C3-C2-C1    | 118.6(5)   | C7-C2-C1    | 123.0(6)   |
| C2-C3-C4    | 121.1(4)   | C2-C3-H3    | 119.4      |
| C4-C3-H3    | 119.4      | C5-C4-C3    | 120.7(5)   |
| C5-C4-H4    | 119.7      | C3-C4-H4    | 119.7      |
| C4-C5-C6    | 117.9(5)   | C4-C5-C8    | 122.3(4)   |
| C6-C5-C8    | 119.6(4)   | C7-C6-C5    | 121.1(5)   |
| C7-C6-H6    | 119.5      | C5-C6-H6    | 119.5      |
| C6-C7-C2    | 120.8(6)   | C6-C7-H7    | 119.6      |
| C2-C7-H7    | 119.6      | C9-C8-C5    | 126.8(4)   |

|             |          |             |          |
|-------------|----------|-------------|----------|
| C9-C8-S1    | 116.0(3) | C5-C8-S1    | 117.1(3) |
| C8-C9-C10   | 129.0(4) | C8-C9-S2    | 116.9(3) |
| C10-C9-S2   | 113.9(3) | C11-C10-C15 | 119.3(4) |
| C11-C10-C9  | 121.6(4) | C15-C10-C9  | 118.9(4) |
| C10-C11-C12 | 120.5(4) | C10-C11-H11 | 119.7    |
| C12-C11-H11 | 119.7    | C13-C12-C11 | 119.4(4) |
| C13-C12-H12 | 120.3    | C11-C12-H12 | 120.3    |
| C14-C13-C12 | 119.9(4) | C14-C13-C16 | 119.6(4) |
| C12-C13-C16 | 120.5(4) | C13-C14-C15 | 120.5(4) |
| C13-C14-H14 | 119.7    | C15-C14-H14 | 119.7    |
| C10-C15-C14 | 120.3(4) | C10-C15-H15 | 119.9    |
| C14-C15-H15 | 119.9    | O3-C16-O4   | 127.6(4) |
| O3-C16-C13  | 117.8(4) | O4-C16-C13  | 114.6(4) |
| C18-C17-S1  | 124.7(3) | C18-C17-S2  | 123.9(3) |
| S1-C17-S2   | 111.2(2) | C17-C18-C19 | 123.0(3) |
| C17-C18-C27 | 122.8(4) | C19-C18-C27 | 113.7(3) |
| C20-C19-C24 | 119.1(4) | C20-C19-C18 | 123.6(3) |
| C24-C19-C18 | 117.3(3) | C21-C20-C19 | 120.5(4) |
| C21-C20-H20 | 119.7    | C19-C20-H20 | 119.7    |
| C22-C21-C20 | 120.3(4) | C22-C21-H21 | 119.8    |
| C20-C21-H21 | 119.8    | C21-C22-C23 | 120.0(4) |
| C21-C22-H22 | 120.0    | C23-C22-H22 | 120.0    |
| C24-C23-C22 | 120.4(4) | C24-C23-H23 | 119.8    |
| C22-C23-H23 | 119.8    | C23-C24-C19 | 119.6(3) |
| C23-C24-C25 | 123.7(3) | C19-C24-C25 | 116.7(3) |
| C32-C25-C26 | 123.1(3) | C32-C25-C24 | 122.1(3) |
| C26-C25-C24 | 114.3(3) | C31-C26-C27 | 119.2(3) |

|             |          |             |            |
|-------------|----------|-------------|------------|
| C31-C26-C25 | 123.6(3) | C27-C26-C25 | 117.1(3)   |
| C28-C27-C26 | 119.6(3) | C28-C27-C18 | 123.3(3)   |
| C26-C27-C18 | 117.1(3) | C29-C28-C27 | 120.7(4)   |
| C29-C28-H28 | 119.7    | C27-C28-H28 | 119.7      |
| C30-C29-C28 | 119.7(4) | C30-C29-H29 | 120.2      |
| C28-C29-H29 | 120.2    | C29-C30-C31 | 120.5(4)   |
| C29-C30-H30 | 119.7    | C31-C30-H30 | 119.7      |
| C30-C31-C26 | 120.3(4) | C30-C31-H31 | 119.8      |
| C26-C31-H31 | 119.8    | C25-C32-S4  | 124.0(3)   |
| C25-C32-S3  | 123.7(3) | S4-C32-S3   | 112.07(19) |
| C34-C33-C35 | 125.0(3) | C34-C33-S3  | 116.7(3)   |
| C35-C33-S3  | 118.3(3) | C33-C34-C42 | 126.4(3)   |
| C33-C34-S4  | 116.9(3) | C42-C34-S4  | 116.7(3)   |
| C40-C35-C36 | 119.1(3) | C40-C35-C33 | 121.4(3)   |
| C36-C35-C33 | 119.4(3) | C37-C36-C35 | 120.1(3)   |
| C37-C36-H36 | 119.9    | C35-C36-H36 | 119.9      |
| C36-C37-C38 | 120.5(4) | C36-C37-H37 | 119.8      |
| C38-C37-H37 | 119.8    | C37-C38-C39 | 119.7(3)   |
| C37-C38-C41 | 119.6(4) | C39-C38-C41 | 120.6(3)   |
| C40-C39-C38 | 119.5(3) | C40-C39-H39 | 120.3      |
| C38-C39-H39 | 120.3    | C39-C40-C35 | 120.9(4)   |
| C39-C40-H40 | 119.6    | C35-C40-H40 | 119.6      |
| O5-C41-O6   | 122.2(4) | O5-C41-C38  | 120.0(4)   |
| O6-C41-C38  | 117.8(4) | C47-C42-C43 | 119.0(4)   |
| C47-C42-C34 | 120.3(3) | C43-C42-C34 | 120.7(3)   |
| C44-C43-C42 | 120.1(4) | C44-C43-H43 | 120.0      |
| C42-C43-H43 | 120.0    | C43-C44-C45 | 120.3(4)   |



|               |           |               |           |
|---------------|-----------|---------------|-----------|
| C43-C44-H44   | 119.8     | C45-C44-H44   | 119.8     |
| C46-C45-C44   | 119.7(4)  | C46-C45-C48   | 120.4(4)  |
| C44-C45-C48   | 119.8(4)  | C45-C46-C47   | 120.3(4)  |
| C45-C46-H46   | 119.9     | C47-C46-H46   | 119.9     |
| C46-C47-C42   | 120.5(4)  | C46-C47-H47   | 119.7     |
| C42-C47-H47   | 119.7     | O8-C48-O7     | 121.5(4)  |
| O8-C48-C45    | 119.3(4)  | O7-C48-C45    | 119.2(4)  |
| O8-C48-Tb1    | 58.6(2)   | O7-C48-Tb1    | 63.1(2)   |
| C45-C48-Tb1   | 174.5(4)  | C52-N49-C50   | 130.2(13) |
| C52-N49-C51   | 109.9(15) | C50-N49-C51   | 119.8(12) |
| N49-C50-H50A  | 109.5     | N49-C50-H50B  | 109.5     |
| H50A-C50-H50B | 109.5     | N49-C50-H50C  | 109.5     |
| H50A-C50-H50C | 109.5     | H50B-C50-H50C | 109.5     |
| N49-C51-H51A  | 109.5     | N49-C51-H51B  | 109.5     |
| H51A-C51-H51B | 109.5     | N49-C51-H51C  | 109.5     |
| H51A-C51-H51C | 109.5     | H51B-C51-H51C | 109.5     |
| O53-C52-N49   | 122.3(17) | O53-C52-H52   | 118.9     |
| N49-C52-H52   | 118.9     | C55-N54-C56   | 116.0(14) |
| C55-N54-C57   | 143.5(14) | C56-N54-C57   | 100.5(12) |
| N54-C55-H55A  | 109.5     | N54-C55-H55B  | 109.5     |
| H55A-C55-H55B | 109.5     | N54-C55-H55C  | 109.5     |
| H55A-C55-H55C | 109.5     | H55B-C55-H55C | 109.5     |
| O58-C57-N54   | 128.7(19) | O58-C57-H57   | 115.7     |
| N54-C57-H57   | 115.7     | N54-C56-H56A  | 109.5     |
| N54-C56-H56B  | 109.5     | H56A-C56-H56B | 109.5     |
| N54-C56-H56C  | 109.5     | H56A-C56-H56C | 109.5     |
| H56B-C56-H56C | 109.5     | C61-N59-C62   | 110.2(19) |

|                    |           |                    |           |
|--------------------|-----------|--------------------|-----------|
| C61-N59-C60        | 125.5(18) | C62-N59-C60        | 123.3(13) |
| N59-C60-H60A       | 109.5     | N59-C60-H60B       | 109.5     |
| H60A-C60-H60B      | 109.5     | N59-C60-H60C       | 109.5     |
| H60A-C60-H60C      | 109.5     | H60B-C60-H60C      | 109.5     |
| O63-C62-N59        | 117.3(14) | O63-C62-H62        | 121.3     |
| N59-C62-H62        | 121.3     | N59-C61-H61A       | 109.5     |
| N59-C61-H61B       | 109.5     | H61A-C61-H61B      | 109.5     |
| N59-C61-H61C       | 109.5     | H61A-C61-H61C      | 109.5     |
| H61B-C61-H61C      | 109.5     | H10A-O10W-<br>H10B | 128.0(14) |
| H11B-O11W-<br>H11A | 114.7(15) | N64B-C65B-H65A     | 109.5     |
| N64B-C65B-H65B     | 109.5     | H65A-C65B-H65B     | 109.5     |
| N64B-C65B-H65C     | 109.5     | H65A-C65B-H65C     | 109.5     |
| H65B-C65B-H65C     | 109.5     | N64B-C66B-H66A     | 109.5     |
| N64B-C66B-H66B     | 109.5     | H66A-C66B-H66B     | 109.5     |
| N64B-C66B-H66C     | 109.5     | H66A-C66B-H66C     | 109.5     |
| H66B-C66B-H66C     | 109.5     | O68B-C67B-N64B     | 122.(3)   |
| O68B-C67B-H67B     | 118.8     | N64B-C67B-H67B     | 118.8     |
| C65B-N64B-C67B     | 106.(2)   | C65B-N64B-C66B     | 124.(3)   |
| C67B-N64B-C66B     | 129.(2)   | N64A-C65A-H65D     | 109.5     |
| N64A-C65A-H65E     | 109.5     | H65D-C65A-H65E     | 109.5     |
| N64A-C65A-H65F     | 109.5     | H65D-C65A-H65F     | 109.5     |
| H65E-C65A-H65F     | 109.5     | O68A-C67A-N64A     | 157.(4)   |
| O68A-C67A-H67A     | 101.5     | N64A-C67A-H67A     | 101.5     |
| C67A-N64A-C65A     | 124.(2)   | C67A-N64A-C66A     | 134.(3)   |
| C65A-N64A-C66A     | 101.(2)   | N64A-C66A-H66D     | 109.5     |
| N64A-C66A-H66E     | 109.5     | H66D-C66A-H66E     | 109.5     |

N64A-C66A-H66F 109.5      H66D-C66A-H66F 109.5

H66E-C66A-H66F 109.5

**Table S6. Anisotropic atomic displacement parameters ( $\text{\AA}^2$ ) for Tb-MOF.**

The anisotropic atomic displacement factor exponent takes the form: -  
 $2\pi^2 [ h^2 a^{*2} U_{11} + \dots + 2 h k a^* b^* U_{12} ]$

|     | $U_{11}$    | $U_{22}$    | $U_{33}$         | $U_{23}$         | $U_{13}$         | $U_{12}$         |
|-----|-------------|-------------|------------------|------------------|------------------|------------------|
| Tb1 | 0.02177(10) | 0.02165(10) | 0.01529(9)       | $0.00445(6)^{-}$ | $0.00105(6)^{-}$ | $0.01030(6)^{-}$ |
| S1  | 0.0218(4)   | 0.0484(6)   | 0.0419(6)        | -0.0325(5)       | 0.0091(4)        | -0.0127(4)       |
| S2  | 0.0228(4)   | 0.0301(5)   | 0.0261(4)        | -0.0152(4)       | 0.0033(3)        | -0.0057(3)       |
| S3  | 0.0166(4)   | 0.0215(4)   | 0.0242(4)        | -0.0015(3)       | -0.0033(3)       | -0.0055(3)       |
| S4  | 0.0173(4)   | 0.0206(4)   | 0.0250(4)        | 0.0002(3)        | -0.0042(3)       | -0.0070(3)       |
| O1  | 0.069(3)    | 0.096(4)    | 0.062(3)         | -0.060(3)        | 0.005(2)         | -0.035(3)        |
| O2  | 0.242(10)   | 0.178(8)    | 0.239(10)        | -0.156(8)        | -0.198(9)        | 0.119(7)         |
| O3  | 0.0283(14)  | 0.0433(17)  | $0.0267(14)^{-}$ | $0.0203(13)^{-}$ | $0.0058(11)^{-}$ | $0.0098(12)^{-}$ |
| O4  | 0.0336(16)  | 0.054(2)    | $0.0419(18)^{-}$ | $0.0279(16)^{-}$ | $0.0187(14)^{-}$ | $0.0235(15)^{-}$ |
| O5  | 0.0301(15)  | 0.063(2)    | $0.0208(14)^{-}$ | $0.0032(14)^{-}$ | $0.0117(12)^{-}$ | $0.0105(15)^{-}$ |
| O6  | 0.0456(18)  | 0.0292(15)  | 0.0257(14)       | $0.0025(12)^{-}$ | $0.0119(13)^{-}$ | $0.0039(13)^{-}$ |
| O7  | 0.0495(19)  | 0.0460(19)  | $0.0290(15)^{-}$ | $0.0037(14)^{-}$ | $0.0012(14)^{-}$ | $0.0327(16)^{-}$ |
| O8  | 0.0270(16)  | 0.061(2)    | 0.064(3)         | 0.035(2)         | $0.0163(17)^{-}$ | $0.0229(17)^{-}$ |
| O9W | 0.078(4)    | 0.042(3)    | 0.137(6)         | -0.017(3)        | -0.020(4)        | 0.010(2)         |
| C1  | 0.067(4)    | 0.104(6)    | 0.117(7)         | -0.089(6)        | -0.058(5)        | 0.034(4)         |
| C2  | 0.048(3)    | 0.078(4)    | 0.096(5)         | -0.072(4)        | -0.036(3)        | 0.019(3)         |

|     | <b>U<sub>11</sub></b> | <b>U<sub>22</sub></b> | <b>U<sub>33</sub></b> | <b>U<sub>23</sub></b> | <b>U<sub>13</sub></b> | <b>U<sub>12</sub></b> |
|-----|-----------------------|-----------------------|-----------------------|-----------------------|-----------------------|-----------------------|
| C3  | 0.040(2)              | 0.051(3)              | 0.060(3)              | -0.042(3)             | -0.003(2)             | -0.012(2)             |
| C4  | 0.039(2)              | 0.040(2)              | 0.054(3)              | -0.030(2)             | -0.005(2)             | 0.0087(19)            |
| C5  | 0.0274(19)            | 0.043(2)              | 0.048(3)              | -0.031(2)             | 0.0048(18)            | 0.0034(17)            |
| C6  | 0.079(5)              | 0.085(5)              | 0.135(7)              | -0.096(5)             | -0.070(5)             | 0.045(4)              |
| C7  | 0.114(7)              | 0.092(6)              | 0.157(9)              | -0.106(6)             | -0.100(7)             | 0.062(5)              |
| C8  | 0.0259(18)            | 0.037(2)              | 0.033(2)              | 0.0231(17)            | 0.0039(15)            | 0.0077(16)            |
| C9  | 0.0277(18)            | 0.0295(19)            | 0.0258(18)            | 0.0154(15)            | 0.0035(14)            | 0.0082(15)            |
| C10 | 0.0229(17)            | 0.0298(18)            | 0.0245(17)            | 0.0141(15)            | 0.0021(13)            | 0.0066(14)            |
| C11 | 0.041(2)              | 0.033(2)              | 0.038(2)              | 0.0179(18)            | 0.0165(19)            | 0.0166(18)            |
| C12 | 0.037(2)              | 0.032(2)              | 0.039(2)              | 0.0218(18)            | 0.0138(18)            | 0.0129(17)            |
| C13 | 0.0211(16)            | 0.034(2)              | 0.0235(17)            | 0.0135(15)            | 0.0048(13)            | 0.0082(14)            |
| C14 | 0.046(3)              | 0.035(2)              | 0.032(2)              | 0.0127(18)            | 0.0124(19)            | -0.019(2)             |
| C15 | 0.044(2)              | 0.031(2)              | 0.034(2)              | 0.0178(18)            | 0.0115(19)            | 0.0128(18)            |
| C16 | 0.0246(17)            | 0.038(2)              | 0.0238(17)            | 0.0156(16)            | 0.0043(14)            | 0.0067(15)            |
| C17 | 0.0232(16)            | 0.0235(16)            | 0.0256(17)            | 0.0115(14)            | 0.0061(13)            | 0.0104(13)            |
| C18 | 0.0242(17)            | 0.0199(16)            | 0.0228(16)            | 0.0078(13)            | 0.0034(13)            | 0.0087(13)            |
| C19 | 0.0257(17)            | 0.0202(16)            | 0.0192(15)            | 0.0064(13)            | 0.0000(13)            | 0.0072(13)            |
| C20 | 0.034(2)              | 0.0214(17)            | 0.0261(18)            | 0.0084(14)            | 0.0041(15)            | 0.0037(15)            |

|     | <b>U<sub>11</sub></b> | <b>U<sub>22</sub></b> | <b>U<sub>33</sub></b> | <b>U<sub>23</sub></b> | <b>U<sub>13</sub></b> | <b>U<sub>12</sub></b> |
|-----|-----------------------|-----------------------|-----------------------|-----------------------|-----------------------|-----------------------|
| C21 | 0.032(2)              | 0.0258(19)            | 0.035(2)              | -<br>0.0086(16)       | -<br>0.0117(16)       | 0.0019(15)            |
| C22 | 0.0275(19)            | 0.0286(19)            | 0.035(2)              | -<br>0.0081(16)       | -<br>0.0121(16)       | -<br>0.0015(15)       |
| C23 | 0.0253(17)            | 0.0236(17)            | 0.0265(18)            | -<br>0.0077(14)       | -<br>0.0068(14)       | -<br>0.0041(14)       |
| C24 | 0.0226(16)            | 0.0198(15)            | 0.0161(14)            | -<br>0.0041(12)       | -<br>0.0005(12)       | -<br>0.0058(13)       |
| C25 | 0.0184(15)            | 0.0196(15)            | 0.0192(15)            | -<br>0.0064(12)       | -<br>0.0019(12)       | -<br>0.0062(12)       |
| C26 | 0.0197(15)            | 0.0213(16)            | 0.0175(15)            | -<br>0.0064(12)       | 0.0020(12)            | -<br>0.0074(12)       |
| C27 | 0.0276(17)            | 0.0225(16)            | 0.0214(16)            | -<br>0.0098(13)       | 0.0047(13)            | -<br>0.0104(14)       |
| C28 | 0.034(2)              | 0.032(2)              | 0.035(2)              | -<br>0.0173(17)       | 0.0122(17)            | -<br>0.0199(17)       |
| C29 | 0.030(2)              | 0.045(2)              | 0.045(3)              | -0.025(2)             | 0.0165(18)            | -<br>0.0213(19)       |
| C30 | 0.0270(19)            | 0.038(2)              | 0.039(2)              | -<br>0.0216(19)       | 0.0094(16)            | -<br>0.0123(17)       |
| C31 | 0.0249(17)            | 0.0244(17)            | 0.0265(18)            | -<br>0.0123(14)       | 0.0022(14)            | -<br>0.0066(14)       |
| C32 | 0.0163(14)            | 0.0207(15)            | 0.0209(15)            | -<br>0.0066(13)       | -<br>0.0026(12)       | -<br>0.0050(12)       |
| C33 | 0.0224(16)            | 0.0202(15)            | 0.0197(15)            | -<br>0.0012(12)       | -<br>0.0052(12)       | -<br>0.0080(13)       |
| C34 | 0.0218(16)            | 0.0202(15)            | 0.0194(15)            | -<br>0.0004(12)       | -<br>0.0045(12)       | -<br>0.0090(13)       |
| C35 | 0.0217(16)            | 0.0240(16)            | 0.0173(15)            | -<br>0.0018(13)       | -<br>0.0056(12)       | -<br>0.0067(13)       |
| C36 | 0.033(2)              | 0.0251(18)            | 0.0278(18)            | -<br>0.0029(15)       | -<br>0.0175(16)       | -<br>0.0067(15)       |

|     | <b>U<sub>11</sub></b> | <b>U<sub>22</sub></b> | <b>U<sub>33</sub></b> | <b>U<sub>23</sub></b> | <b>U<sub>13</sub></b> | <b>U<sub>12</sub></b> |
|-----|-----------------------|-----------------------|-----------------------|-----------------------|-----------------------|-----------------------|
| C37 | 0.035(2)              | 0.0212(17)            | 0.0257(18)            | 0.0035(14)            | 0.0128(15)            | 0.0053(15)            |
| C38 | 0.0231(16)            | 0.0280(18)            | 0.0177(15)            | 0.0036(13)            | 0.0061(13)            | 0.0050(14)            |
| C39 | 0.0252(18)            | 0.037(2)              | 0.0222(17)            | 0.0024(15)            | 0.0083(14)            | 0.0129(16)            |
| C40 | 0.0245(17)            | 0.0276(18)            | 0.0229(17)            | 0.0023(14)            | 0.0064(14)            | 0.0121(14)            |
| C41 | 0.0253(18)            | 0.039(2)              | 0.0158(16)            | 0.0037(15)            | 0.0056(13)            | 0.0010(16)            |
| C42 | 0.0212(16)            | 0.0253(17)            | 0.0229(17)            | 0.0010(14)            | 0.0029(13)            | 0.0100(14)            |
| C43 | 0.038(2)              | 0.052(3)              | 0.0247(19)            | 0.0069(18)            | 0.0012(17)            | -0.029(2)             |
| C44 | 0.041(2)              | 0.050(3)              | 0.0235(19)            | 0.0045(18)            | 0.0008(17)            | -0.028(2)             |
| C45 | 0.0262(18)            | 0.0269(18)            | 0.0292(19)            | 0.0017(15)            | 0.0022(15)            | 0.0126(15)            |
| C46 | 0.0277(19)            | 0.041(2)              | 0.036(2)              | 0.0053(18)            | 0.0116(17)            | 0.0212(18)            |
| C47 | 0.030(2)              | 0.040(2)              | 0.0262(19)            | 0.0014(16)            | 0.0081(15)            | 0.0192(17)            |
| C48 | 0.031(2)              | 0.028(2)              | 0.034(2)              | 0.0044(16)            | 0.0019(16)            | 0.0137(16)            |
| N49 | 0.017(3)              | 0.083(7)              | 0.051(5)              | 0.010(5)              | -0.009(3)             | -0.026(4)             |
| C50 | 0.054(7)              | 0.049(6)              | 0.068(8)              | 0.010(6)              | -0.020(6)             | -0.032(5)             |
| C51 | 0.048(8)              | 0.095(13)             | 0.115(15)             | -0.042(11)            | 0.009(8)              | -0.013(8)             |
| C52 | 0.070(5)              | 0.083(6)              | 0.084(6)              | -0.021(4)             | -0.014(4)             | -0.037(4)             |
| O53 | 0.044(4)              | 0.109(7)              | 0.117(8)              | -0.003(6)             | -0.034(5)             | -0.034(5)             |
| N54 | 0.022(3)              | 0.039(4)              | 0.053(5)              | -0.032(4)             | -0.001(3)             | 0.009(3)              |
| C55 | 0.075(7)              | 0.073(7)              | 0.121(9)              | -0.063(7)             | 0.045(7)              | -0.040(6)             |

|      | <b>U<sub>11</sub></b> | <b>U<sub>22</sub></b> | <b>U<sub>33</sub></b> | <b>U<sub>23</sub></b> | <b>U<sub>13</sub></b> | <b>U<sub>12</sub></b> |
|------|-----------------------|-----------------------|-----------------------|-----------------------|-----------------------|-----------------------|
| C57  | 0.071(5)              | 0.065(5)              | 0.072(5)              | -0.030(4)             | -0.010(4)             | -0.001(4)             |
| C56  | 0.040(5)              | 0.047(5)              | 0.122(8)              | -0.063(6)             | -0.004(5)             | 0.006(4)              |
| O58  | 0.150(10)             | 0.124(9)              | 0.203(11)             | -0.076(8)             | 0.037(8)              | -0.057(8)             |
| N59  | 0.115(11)             | 0.054(6)              | 0.039(5)              | -0.006(5)             | -0.025(6)             | -0.011(7)             |
| C60  | 0.045(6)              | 0.134(14)             | 0.031(5)              | -0.028(7)             | -0.005(5)             | -0.012(8)             |
| C62  | 0.054(7)              | 0.064(7)              | 0.033(5)              | -0.006(5)             | -0.007(5)             | -0.017(6)             |
| C61  | 0.150(17)             | 0.112(14)             | 0.109(14)             | -0.034(12)            | -0.017(13)            | -0.010(13)            |
| O63  | 0.081(8)              | 0.109(10)             | 0.083(8)              | -0.026(8)             | -0.019(7)             | -0.011(7)             |
| O10W | 0.015(5)              | 0.053(7)              | 0.019(5)              | -0.013(5)             | 0.006(4)              | -0.011(5)             |
| O11W | 0.010(5)              | 0.057(8)              | 0.040(7)              | 0.001(6)              | -0.007(5)             | -0.001(5)             |
| C65B | 0.079(4)              | 0.065(4)              | 0.072(4)              | -0.027(4)             | -0.009(4)             | -0.023(4)             |
| O68B | 0.081(4)              | 0.050(4)              | 0.062(4)              | -0.040(3)             | -0.005(3)             | -0.023(3)             |
| C66B | 0.076(5)              | 0.069(5)              | 0.078(5)              | -0.028(4)             | -0.010(5)             | -0.020(5)             |
| C67B | 0.078(3)              | 0.067(3)              | 0.072(3)              | -0.030(2)             | -0.009(2)             | -0.019(2)             |
| N64B | 0.078(3)              | 0.068(3)              | 0.074(3)              | -0.028(2)             | -0.008(2)             | -0.020(2)             |
| C65A | 0.073(5)              | 0.049(5)              | 0.056(5)              | -0.039(4)             | -0.006(4)             | -0.017(4)             |
| C67A | 0.078(3)              | 0.067(3)              | 0.073(3)              | -0.029(2)             | -0.008(2)             | -0.019(2)             |
| N64A | 0.077(3)              | 0.064(3)              | 0.071(3)              | -0.030(2)             | -0.009(2)             | -0.020(2)             |
| C66A | 0.082(5)              | 0.068(5)              | 0.074(5)              | -0.028(4)             | -0.013(5)             | -0.020(5)             |
| O68A | 0.081(4)              | 0.077(4)              | 0.083(4)              | -0.024(4)             | -0.009(4)             | -0.017(4)             |

**Table S7. Hydrogen atomic coordinates and isotropic atomic displacement parameters ( $\text{\AA}^2$ ) for Tb-MOF.**

|     | <b>x/a</b> | <b>y/b</b> | <b>z/c</b> | <b>U(eq)</b> |
|-----|------------|------------|------------|--------------|
| H2  | -0.0783    | 0.3102     | 0.0633     | 0.306        |
| H9A | -0.1594    | 0.3156     | -0.0374    | 0.05         |

|      | <b>x/a</b> | <b>y/b</b> | <b>z/c</b> | <b>U(eq)</b> |
|------|------------|------------|------------|--------------|
| H9B  | -0.1432    | 0.2331     | -0.0388    | 0.05         |
| H3   | 0.1878     | 0.0784     | 0.1711     | 0.052        |
| H4   | 0.3003     | 0.0328     | 0.2680     | 0.048        |
| H6   | 0.1556     | 0.2861     | 0.2891     | 0.105        |
| H7   | 0.0414     | 0.3294     | 0.1948     | 0.128        |
| H11  | 0.5223     | -0.0487    | 0.2998     | 0.045        |
| H12  | 0.6665     | -0.0759    | 0.1999     | 0.043        |
| H14  | 0.7141     | 0.1836     | 0.1363     | 0.046        |
| H15  | 0.5603     | 0.2142     | 0.2296     | 0.044        |
| H20  | 0.5954     | 0.0614     | 0.5357     | 0.034        |
| H21  | 0.7708     | 0.0794     | 0.5589     | 0.039        |
| H22  | 0.7763     | 0.2222     | 0.5609     | 0.037        |
| H23  | 0.6058     | 0.3491     | 0.5382     | 0.03         |
| H28  | 0.1614     | 0.1537     | 0.5709     | 0.038        |
| H29  | -0.0094    | 0.2456     | 0.6208     | 0.045        |
| H30  | -0.0035    | 0.3912     | 0.6170     | 0.04         |
| H31  | 0.1716     | 0.4462     | 0.5632     | 0.03         |
| H36  | 0.3574     | 0.7796     | 0.2968     | 0.034        |
| H37  | 0.2724     | 0.9066     | 0.1988     | 0.033        |
| H39  | 0.0870     | 0.7488     | 0.1725     | 0.034        |
| H40  | 0.1756     | 0.6210     | 0.2687     | 0.03         |
| H43  | 0.4856     | 0.6334     | 0.1913     | 0.043        |
| H44  | 0.6127     | 0.7192     | 0.0989     | 0.045        |
| H46  | 0.7945     | 0.7041     | 0.2552     | 0.043        |
| H47  | 0.6614     | 0.6254     | 0.3485     | 0.039        |
| H50A | -0.1139    | 0.0479     | 0.2438     | 0.089        |



|      | <b>x/a</b> | <b>y/b</b> | <b>z/c</b> | <b>U(eq)</b> |
|------|------------|------------|------------|--------------|
| H50B | 0.0193     | -0.0140    | 0.2626     | 0.089        |
| H50C | -0.0966    | -0.0560    | 0.3031     | 0.089        |
| H51A | -0.1873    | 0.1591     | 0.2872     | 0.134        |
| H51B | -0.2187    | 0.1280     | 0.3759     | 0.134        |
| H51C | -0.1012    | 0.1679     | 0.3349     | 0.134        |
| H52  | -0.0445    | 0.0342     | 0.4326     | 0.091        |
| H55A | -0.1742    | 0.3487     | 0.3850     | 0.129        |
| H55B | -0.0552    | 0.2846     | 0.4235     | 0.129        |
| H55C | -0.1423    | 0.3671     | 0.4516     | 0.129        |
| H57  | -0.0950    | 0.4764     | 0.2591     | 0.085        |
| H56A | 0.0917     | 0.4568     | 0.3438     | 0.096        |
| H56B | 0.0207     | 0.4331     | 0.4267     | 0.096        |
| H56C | 0.1079     | 0.3506     | 0.3986     | 0.096        |
| H60A | -0.5895    | 0.1868     | 0.0512     | 0.109        |
| H60B | -0.5870    | 0.2229     | 0.1157     | 0.109        |
| H60C | -0.6678    | 0.2888     | 0.0501     | 0.109        |
| H62  | -0.3228    | 0.2571     | -0.0393    | 0.063        |
| H61A | -0.5329    | 0.3871     | 0.0473     | 0.196        |
| H61B | -0.3915    | 0.3347     | 0.0453     | 0.196        |
| H61C | -0.4476    | 0.3970     | -0.0308    | 0.196        |
| H10A | 0.5327     | 1.0257     | -0.1193    | 0.05         |
| H10B | 0.4906     | 0.9807     | -0.0305    | 0.05         |
| H11B | 0.4447     | 0.9771     | -0.0384    | 0.05         |
| H11A | 0.4891     | 0.9943     | 0.0158     | 0.05         |
| H65A | 0.5469     | 0.4724     | 0.1218     | 0.105        |
| H65B | 0.4782     | 0.3980     | 0.1843     | 0.105        |

|      | <b>x/a</b> | <b>y/b</b> | <b>z/c</b> | <b>U(eq)</b> |
|------|------------|------------|------------|--------------|
| H65C | 0.4855     | 0.4869     | 0.1995     | 0.105        |
| H66A | 0.8220     | 0.3438     | 0.1929     | 0.109        |
| H66B | 0.7643     | 0.3555     | 0.1228     | 0.109        |
| H66C | 0.7747     | 0.4457     | 0.1347     | 0.109        |
| H67B | 0.6660     | 0.3130     | 0.3129     | 0.084        |
| H65D | 0.3146     | 0.3970     | 0.2845     | 0.079        |
| H65E | 0.4091     | 0.3030     | 0.3248     | 0.079        |
| H65F | 0.3889     | 0.3952     | 0.3437     | 0.079        |
| H67A | 0.5974     | 0.3456     | 0.3094     | 0.085        |
| H66D | 0.3316     | 0.4602     | 0.2030     | 0.109        |
| H66E | 0.4231     | 0.5259     | 0.1794     | 0.109        |
| H66F | 0.4497     | 0.4469     | 0.1435     | 0.109        |

**Table S8. Sample and crystal data for Er-MOF.**

|                             |                              |                            |
|-----------------------------|------------------------------|----------------------------|
| <b>Identification code</b>  | D8_4262_B2_8                 |                            |
| <b>Chemical formula</b>     | $C_{54}H_{43}ErN_2O_{12}S_4$ |                            |
| <b>Formula weight</b>       | 1207.40 g/mol                |                            |
| <b>Temperature</b>          | 100(2) K                     |                            |
| <b>Wavelength</b>           | 0.71073 Å                    |                            |
| <b>Crystal size</b>         | 0.051 x 0.064 x 0.081 mm     |                            |
| <b>Crystal system</b>       | triclinic                    |                            |
| <b>Space group</b>          | P -1                         |                            |
| <b>Unit cell dimensions</b> | a = 11.6009(10) Å            | $\alpha = 66.704(3)^\circ$ |
|                             | b = 16.1085(14) Å            | $\beta = 76.136(3)^\circ$  |
|                             | c = 19.5975(17) Å            | $\gamma = 72.168(3)^\circ$ |
| <b>Volume</b>               | 3172.5(5) Å <sup>3</sup>     |                            |

|                               |                         |
|-------------------------------|-------------------------|
| <b>Z</b>                      | 2                       |
| <b>Density (calculated)</b>   | 1.264 g/cm <sup>3</sup> |
| <b>Absorption coefficient</b> | 1.507 mm <sup>-1</sup>  |
| <b>F(000)</b>                 | 1218                    |

**Table S9. Data collection and structure refinement for Er-MOF.**

**Theta range for data collection** 2.06 to 28.31°

|                                            |                                                                                                                                                                |                              |
|--------------------------------------------|----------------------------------------------------------------------------------------------------------------------------------------------------------------|------------------------------|
| <b>Index ranges</b>                        | -15<=h<=15, -21<=k<=21, -26<=l<=26                                                                                                                             |                              |
| <b>Reflections collected</b>               | 111398                                                                                                                                                         |                              |
| <b>Independent reflections</b>             | 15744 [R(int) = 0.0278]                                                                                                                                        |                              |
| <b>Coverage of independent reflections</b> | 99.6%                                                                                                                                                          |                              |
| <b>Absorption correction</b>               | Multi-Scan                                                                                                                                                     |                              |
| <b>Max. and min. transmission</b>          | 1.0000 and 0.9313                                                                                                                                              |                              |
| <b>Structure solution technique</b>        | direct methods                                                                                                                                                 |                              |
| <b>Structure solution program</b>          | SHELXT 2014/5 (Sheldrick, 2014)                                                                                                                                |                              |
| <b>Refinement method</b>                   | Full-matrix least-squares on F <sup>2</sup>                                                                                                                    |                              |
| <b>Refinement program</b>                  | SHELXL-2016/6 (Sheldrick, 2016)                                                                                                                                |                              |
| <b>Function minimized</b>                  | $\Sigma w(F_o^2 - F_c^2)^2$                                                                                                                                    |                              |
| <b>Data / restraints / parameters</b>      | 15744 / 295 / 808                                                                                                                                              |                              |
| <b>Goodness-of-fit on F<sup>2</sup></b>    | 1.096                                                                                                                                                          |                              |
| <b>Final R indices</b>                     | 15000 data;<br>I>2σ(I)                                                                                                                                         | R1 = 0.0466, wR2 =<br>0.1464 |
|                                            | all data                                                                                                                                                       | R1 = 0.0488, wR2 =<br>0.1492 |
| <b>Weighting scheme</b>                    | w=1/[σ <sup>2</sup> (F <sub>o</sub> <sup>2</sup> )+(0.0887P) <sup>2</sup> +11.5197P]<br>where P=(F <sub>o</sub> <sup>2</sup> +2F <sub>c</sub> <sup>2</sup> )/3 |                              |
| <b>Largest diff. peak and hole</b>         | 2.233 and -1.274 eÅ <sup>-3</sup>                                                                                                                              |                              |
| <b>R.M.S. deviation from mean</b>          | 0.165 eÅ <sup>-3</sup>                                                                                                                                         |                              |

**Table S10. Atomic coordinates and equivalent isotropic atomic displacement parameters ( $\text{\AA}^2$ ) for Er-MOF.**

U(eq) is defined as one third of the trace of the orthogonalized  $U_{ij}$  tensor.

|     | x/a         | y/b        | z/c         | U(eq)       |
|-----|-------------|------------|-------------|-------------|
| Er1 | 0.05505(2)  | 0.11134(2) | 0.99630(2)  | 0.01982(7)  |
| S1  | 0.24372(10) | 0.14790(8) | 0.43145(7)  | 0.0322(2)   |
| S2  | 0.50979(9)  | 0.09388(7) | 0.41115(6)  | 0.02583(19) |
| S3  | 0.26599(8)  | 0.53341(6) | 0.42392(5)  | 0.02090(17) |
| S4  | 0.53314(8)  | 0.47745(7) | 0.41191(6)  | 0.02376(19) |
| O1  | 0.0531(5)   | 0.1824(5)  | 0.0743(3)   | 0.0732(17)  |
| O2  | 0.9200(7)   | 0.2732(7)  | 0.1171(5)   | 0.118(3)    |
| O3  | 0.8053(3)   | 0.9735(2)  | 0.07288(16) | 0.0292(6)   |
| O4  | 0.8890(3)   | 0.0769(3)  | 0.08192(19) | 0.0361(7)   |
| O5  | 0.0634(3)   | 0.9079(3)  | 0.07015(17) | 0.0424(9)   |
| O6  | 0.1608(3)   | 0.9923(2)  | 0.09024(19) | 0.0400(8)   |
| O7  | 0.7590(3)   | 0.8289(2)  | 0.04364(19) | 0.0354(7)   |
| O8  | 0.9008(3)   | 0.7699(3)  | 0.1175(3)   | 0.0650(16)  |
| O9W | 0.8923(6)   | 0.2539(4)  | 0.9824(4)   | 0.0748(15)  |
| C1  | 0.0238(8)   | 0.2183(7)  | 0.1179(6)   | 0.083(3)    |
| C2  | 0.0967(7)   | 0.2005(7)  | 0.1767(6)   | 0.084(3)    |
| C3  | 0.1799(5)   | 0.1181(5)  | 0.1948(4)   | 0.0519(16)  |
| C4  | 0.2480(5)   | 0.0917(4)  | 0.2528(3)   | 0.0420(12)  |
| C5  | 0.2371(4)   | 0.1522(4)  | 0.2899(3)   | 0.0393(11)  |
| C6  | 0.1508(7)   | 0.2348(6)  | 0.2724(5)   | 0.074(2)    |
| C7  | 0.0804(8)   | 0.2589(7)  | 0.2167(6)   | 0.088(3)    |
| C8  | 0.3159(4)   | 0.1303(3)  | 0.3460(3)   | 0.0294(8)   |

|     | <b>x/a</b> | <b>y/b</b> | <b>z/c</b> | <b>U(eq)</b> |
|-----|------------|------------|------------|--------------|
| C9  | 0.4379(4)  | 0.1033(3)  | 0.3383(2)  | 0.0256(8)    |
| C10 | 0.5256(4)  | 0.0855(3)  | 0.2734(2)  | 0.0241(7)    |
| C11 | 0.5577(4)  | 0.9992(3)  | 0.2656(3)  | 0.0341(10)   |
| C12 | 0.6464(4)  | 0.9829(3)  | 0.2070(3)  | 0.0326(9)    |
| C13 | 0.7060(4)  | 0.0513(3)  | 0.1587(2)  | 0.0258(8)    |
| C14 | 0.6757(5)  | 0.1366(3)  | 0.1675(3)  | 0.0359(10)   |
| C15 | 0.5839(5)  | 0.1544(3)  | 0.2240(3)  | 0.0345(10)   |
| C16 | 0.8085(4)  | 0.0324(3)  | 0.0990(2)  | 0.0271(8)    |
| C17 | 0.3777(4)  | 0.1472(3)  | 0.4591(2)  | 0.0241(7)    |
| C18 | 0.3802(4)  | 0.1879(3)  | 0.5068(2)  | 0.0223(7)    |
| C19 | 0.4950(4)  | 0.1944(3)  | 0.5217(2)  | 0.0224(7)    |
| C20 | 0.5990(4)  | 0.1205(3)  | 0.5348(2)  | 0.0268(8)    |
| C21 | 0.7047(4)  | 0.1317(3)  | 0.5479(2)  | 0.0304(9)    |
| C22 | 0.7085(4)  | 0.2162(3)  | 0.5488(2)  | 0.0296(8)    |
| C23 | 0.6059(4)  | 0.2908(3)  | 0.5362(2)  | 0.0241(7)    |
| C24 | 0.4990(3)  | 0.2807(3)  | 0.5221(2)  | 0.0205(7)    |
| C25 | 0.3888(3)  | 0.3575(3)  | 0.5049(2)  | 0.0192(6)    |
| C26 | 0.2726(3)  | 0.3287(3)  | 0.5374(2)  | 0.0195(7)    |
| C27 | 0.2683(4)  | 0.2411(3)  | 0.5396(2)  | 0.0224(7)    |
| C28 | 0.1620(4)  | 0.2092(3)  | 0.5719(3)  | 0.0293(8)    |
| C29 | 0.0602(4)  | 0.2626(3)  | 0.6020(3)  | 0.0339(9)    |
| C30 | 0.0645(4)  | 0.3490(3)  | 0.6004(3)  | 0.0287(8)    |
| C31 | 0.1698(4)  | 0.3821(3)  | 0.5677(2)  | 0.0226(7)    |
| C32 | 0.3949(3)  | 0.4443(2)  | 0.4564(2)  | 0.0192(6)    |
| C33 | 0.3473(3)  | 0.6012(3)  | 0.3441(2)  | 0.0208(7)    |
| C34 | 0.4702(3)  | 0.5755(3)  | 0.3388(2)  | 0.0216(7)    |

|     | <b>x/a</b> | <b>y/b</b> | <b>z/c</b> | <b>U(eq)</b> |
|-----|------------|------------|------------|--------------|
| C35 | 0.2780(3)  | 0.6840(3)  | 0.2906(2)  | 0.0205(7)    |
| C36 | 0.3015(4)  | 0.7710(3)  | 0.2725(2)  | 0.0255(8)    |
| C37 | 0.2504(4)  | 0.8465(3)  | 0.2147(2)  | 0.0258(8)    |
| C38 | 0.1739(3)  | 0.8371(3)  | 0.1743(2)  | 0.0228(7)    |
| C39 | 0.1433(4)  | 0.7523(3)  | 0.1954(2)  | 0.0248(7)    |
| C40 | 0.1954(3)  | 0.6757(3)  | 0.2535(2)  | 0.0227(7)    |
| C41 | 0.1294(4)  | 0.9178(3)  | 0.1070(2)  | 0.0303(9)    |
| C42 | 0.5565(4)  | 0.6229(3)  | 0.2789(2)  | 0.0237(7)    |
| C43 | 0.5398(4)  | 0.6543(3)  | 0.2036(2)  | 0.0312(9)    |
| C44 | 0.6182(4)  | 0.7046(3)  | 0.1476(3)  | 0.0340(9)    |
| C45 | 0.7151(4)  | 0.7209(3)  | 0.1665(3)  | 0.0312(9)    |
| C46 | 0.7348(4)  | 0.6868(3)  | 0.2404(3)  | 0.0371(11)   |
| C47 | 0.6558(4)  | 0.6393(3)  | 0.2966(3)  | 0.0318(9)    |
| C48 | 0.7971(4)  | 0.7760(3)  | 0.1057(3)  | 0.0375(11)   |
| N49 | 0.9140(7)  | 0.0471(7)  | 0.3413(5)  | 0.046(2)     |
| C50 | 0.9273(11) | 0.0057(7)  | 0.2836(6)  | 0.044(3)     |
| C51 | 0.8365(11) | 0.1365(12) | 0.3335(9)  | 0.063(4)     |
| C52 | 0.9636(12) | 0.0070(9)  | 0.4032(8)  | 0.059(3)     |
| O53 | 0.0215(8)  | 0.9246(8)  | 0.4229(7)  | 0.074(3)     |
| N54 | 0.9578(5)  | 0.4116(5)  | 0.3544(4)  | 0.0242(14)   |
| C55 | 0.8717(12) | 0.3592(10) | 0.3857(10) | 0.066(4)     |
| C57 | 0.9700(10) | 0.4715(7)  | 0.2847(7)  | 0.045(2)     |
| C56 | 0.0444(10) | 0.4055(7)  | 0.3998(7)  | 0.046(2)     |
| O58 | 0.0467(11) | 0.5164(7)  | 0.2597(8)  | 0.083(3)     |
| N59 | 0.5172(14) | 0.2834(7)  | 0.0165(5)  | 0.064(3)     |
| C60 | 0.4127(13) | 0.2453(13) | 0.0625(7)  | 0.068(4)     |

|      | <b>x/a</b> | <b>y/b</b> | <b>z/c</b> | <b>U(eq)</b> |
|------|------------|------------|------------|--------------|
| C62  | 0.6067(10) | 0.2362(7)  | 0.9804(5)  | 0.041(2)     |
| C61  | 0.547(2)   | 0.3664(16) | 0.0185(14) | 0.105(7)     |
| O63  | 0.5963(9)  | 0.1647(7)  | 0.9779(5)  | 0.057(2)     |
| O10W | 0.5333(8)  | 0.0102(6)  | 0.9328(5)  | 0.0106(15)   |
| O11W | 0.4332(9)  | 0.0075(7)  | 0.9928(6)  | 0.021(2)     |
| C65B | 0.562(3)   | 0.4645(19) | 0.1491(10) | 0.066(4)     |
| O68B | 0.3903(17) | 0.3683(13) | 0.3046(9)  | 0.055(3)     |
| C66B | 0.695533   | 0.382122   | 0.26015    | 0.065(4)     |
| C67B | 0.47401    | 0.379886   | 0.250361   | 0.053(2)     |
| N64B | 0.58719    | 0.408154   | 0.223593   | 0.058(2)     |
| C65A | 0.348454   | 0.380761   | 0.296206   | 0.046(3)     |
| C67A | 0.5624(18) | 0.3417(16) | 0.3025(13) | 0.051(2)     |
| N64A | 0.4727(14) | 0.3946(12) | 0.2604(9)  | 0.046(2)     |
| C66A | 0.485(3)   | 0.4532(17) | 0.1857(11) | 0.054(3)     |
| O68A | 0.6586(19) | 0.3585(15) | 0.2699(13) | 0.070(3)     |
| O12W | 0.8418(19) | 0.4228(11) | 0.8762(10) | 0.058(4)     |
| O13W | 0.921(2)   | 0.4153(13) | 0.9138(13) | 0.067(5)     |

**Table S11. Bond lengths (Å) for Er-MOF.**

|         |          |         |           |
|---------|----------|---------|-----------|
| Er1-O1  | 2.237(4) | Er1-O5  | 2.262(4)  |
| Er1-O4  | 2.281(3) | Er1-O3  | 2.321(3)  |
| Er1-O6  | 2.328(3) | Er1-O8  | 2.361(4)  |
| Er1-O9W | 2.451(5) | Er1-O7  | 2.461(3)  |
| Er1-C48 | 2.761(4) | Er1-H9B | 2.4272(2) |
| S1-C17  | 1.760(4) | S1-C8   | 1.772(4)  |
| S2-C9   | 1.754(4) | S2-C17  | 1.764(4)  |

|         |          |         |           |
|---------|----------|---------|-----------|
| S3-C33  | 1.760(4) | S3-C32  | 1.766(4)  |
| S4-C34  | 1.757(4) | S4-C32  | 1.761(4)  |
| O1-C1   | 1.144(9) | O2-C1   | 1.257(11) |
| O2-H2   | 0.84     | O3-C16  | 1.256(6)  |
| O4-C16  | 1.253(6) | O5-C41  | 1.251(6)  |
| O6-C41  | 1.257(6) | O7-C48  | 1.268(6)  |
| O8-C48  | 1.246(6) | O9W-H9A | 0.969(5)  |
| O9W-H9B | 0.905(6) | C1-C2   | 1.477(9)  |
| C2-C3   | 1.350(9) | C2-C7   | 1.392(9)  |
| C3-C4   | 1.393(8) | C3-H3   | 0.95      |
| C4-C5   | 1.391(6) | C4-H4   | 0.95      |
| C5-C6   | 1.369(8) | C5-C8   | 1.467(7)  |
| C6-C7   | 1.381(9) | C6-H6   | 0.95      |
| C7-H7   | 0.95     | C8-C9   | 1.337(6)  |
| C9-C10  | 1.491(5) | C10-C11 | 1.384(6)  |
| C10-C15 | 1.387(6) | C11-C12 | 1.397(6)  |
| C11-H11 | 0.95     | C12-C13 | 1.384(6)  |
| C12-H12 | 0.95     | C13-C14 | 1.379(6)  |
| C13-C16 | 1.506(5) | C14-C15 | 1.393(6)  |
| C14-H14 | 0.95     | C15-H15 | 0.95      |
| C17-C18 | 1.346(6) | C18-C19 | 1.472(6)  |
| C18-C27 | 1.480(5) | C19-C20 | 1.402(5)  |
| C19-C24 | 1.408(5) | C20-C21 | 1.388(6)  |
| C20-H20 | 0.95     | C21-C22 | 1.382(6)  |
| C21-H21 | 0.95     | C22-C23 | 1.398(6)  |
| C22-H22 | 0.95     | C23-C24 | 1.401(5)  |
| C23-H23 | 0.95     | C24-C25 | 1.478(5)  |



|          |           |          |           |
|----------|-----------|----------|-----------|
| C25-C32  | 1.357(5)  | C25-C26  | 1.475(5)  |
| C26-C31  | 1.397(5)  | C26-C27  | 1.410(5)  |
| C27-C28  | 1.393(5)  | C28-C29  | 1.388(6)  |
| C28-H28  | 0.95      | C29-C30  | 1.395(6)  |
| C29-H29  | 0.95      | C30-C31  | 1.392(6)  |
| C30-H30  | 0.95      | C31-H31  | 0.95      |
| C33-C34  | 1.348(5)  | C33-C35  | 1.472(5)  |
| C34-C42  | 1.470(5)  | C35-C40  | 1.397(5)  |
| C35-C36  | 1.399(5)  | C36-C37  | 1.381(5)  |
| C36-H36  | 0.95      | C37-C38  | 1.396(5)  |
| C37-H37  | 0.95      | C38-C39  | 1.393(6)  |
| C38-C41  | 1.502(5)  | C39-C40  | 1.395(5)  |
| C39-H39  | 0.95      | C40-H40  | 0.95      |
| C42-C43  | 1.399(6)  | C42-C47  | 1.402(5)  |
| C43-C44  | 1.399(6)  | C43-H43  | 0.95      |
| C44-C45  | 1.388(6)  | C44-H44  | 0.95      |
| C45-C46  | 1.380(7)  | C45-C48  | 1.500(6)  |
| C46-C47  | 1.385(6)  | C46-H46  | 0.95      |
| C47-H47  | 0.95      | N49-C52  | 1.308(15) |
| N49-C51  | 1.416(19) | N49-C50  | 1.481(16) |
| C50-H50A | 0.98      | C50-H50B | 0.98      |
| C50-H50C | 0.98      | C51-H51A | 0.98      |
| C51-H51B | 0.98      | C51-H51C | 0.98      |
| C52-O53  | 1.239(14) | C52-H52  | 0.95      |
| N54-C57  | 1.329(14) | N54-C55  | 1.378(13) |
| N54-C56  | 1.452(12) | C55-H55A | 0.98      |
| C55-H55B | 0.98      | C55-H55C | 0.98      |

|           |           |           |             |
|-----------|-----------|-----------|-------------|
| C57-O58   | 1.208(13) | C57-H57   | 0.95        |
| C56-H56A  | 0.98      | C56-H56B  | 0.98        |
| C56-H56C  | 0.98      | N59-C62   | 1.321(17)   |
| N59-C60   | 1.47(2)   | N59-C61   | 1.50(3)     |
| C60-H60A  | 0.98      | C60-H60B  | 0.98        |
| C60-H60C  | 0.98      | C62-O63   | 1.215(12)   |
| C62-H62   | 0.95      | C61-H61A  | 0.98        |
| C61-H61B  | 0.98      | C61-H61C  | 0.98        |
| O10W-H10A | 0.952(8)  | O10W-H10B | 0.831(9)    |
| O11W-H11B | 0.889(12) | O11W-H11A | 0.806(10)   |
| C65B-N64B | 1.426(17) | C65B-H65A | 0.98        |
| C65B-H65B | 0.98      | C65B-H65C | 0.98        |
| O68B-C67B | 1.251(14) | C66B-N64B | 1.46287(11) |
| C66B-H66A | 0.98      | C66B-H66B | 0.98        |
| C66B-H66C | 0.98      | C67B-N64B | 1.43305(13) |
| C67B-H67B | 0.95      | C65A-N64A | 1.486(15)   |
| C65A-H65D | 0.98      | C65A-H65E | 0.98        |
| C65A-H65F | 0.98      | C67A-O68A | 1.197(18)   |
| C67A-N64A | 1.342(17) | C67A-H67A | 0.95        |
| N64A-C66A | 1.395(17) | C66A-H66D | 0.98        |
| C66A-H66E | 0.98      | C66A-H66F | 0.98        |
| O12W-H12A | 0.86(2)   | O12W-H12B | 0.854(19)   |
| O13W-H13A | 0.91(2)   | O13W-H13B | 0.99(2)     |

**Table S12. Bond angles (°) for Er-MOF.**

|           |            |           |            |
|-----------|------------|-----------|------------|
| O1-Er1-O5 | 143.51(19) | O1-Er1-O4 | 78.56(15)  |
| O5-Er1-O4 | 76.79(12)  | O1-Er1-O3 | 139.32(17) |

|             |            |             |            |
|-------------|------------|-------------|------------|
| O5-Er1-O3   | 76.85(12)  | O4-Er1-O3   | 130.51(12) |
| O1-Er1-O6   | 77.3(2)    | O5-Er1-O6   | 125.07(15) |
| O4-Er1-O6   | 82.66(13)  | O3-Er1-O6   | 79.37(12)  |
| O1-Er1-O8   | 97.8(2)    | O5-Er1-O8   | 83.36(16)  |
| O4-Er1-O8   | 138.15(13) | O3-Er1-O8   | 78.18(16)  |
| O6-Er1-O8   | 137.82(12) | O1-Er1-O9W  | 66.9(2)    |
| O5-Er1-O9W  | 79.82(18)  | O4-Er1-O9W  | 70.98(18)  |
| O3-Er1-O9W  | 141.85(17) | O6-Er1-O9W  | 138.66(18) |
| O8-Er1-O9W  | 69.45(19)  | O1-Er1-O7   | 72.80(14)  |
| O5-Er1-O7   | 131.19(12) | O4-Er1-O7   | 150.74(12) |
| O3-Er1-O7   | 72.50(12)  | O6-Er1-O7   | 85.29(12)  |
| O8-Er1-O7   | 53.99(12)  | O9W-Er1-O7  | 102.34(17) |
| O1-Er1-C48  | 86.26(18)  | O5-Er1-C48  | 106.83(15) |
| O4-Er1-C48  | 156.40(15) | O3-Er1-C48  | 72.13(14)  |
| O6-Er1-C48  | 111.67(13) | O8-Er1-C48  | 26.73(14)  |
| O9W-Er1-C48 | 86.51(18)  | O7-Er1-C48  | 27.33(13)  |
| O1-Er1-H9B  | 84.90(17)  | O5-Er1-H9B  | 59.76(10)  |
| O4-Er1-H9B  | 61.72(10)  | O3-Er1-H9B  | 131.50(8)  |
| O6-Er1-H9B  | 142.76(9)  | O8-Er1-H9B  | 76.44(9)   |
| O9W-Er1-H9B | 21.37(15)  | O7-Er1-H9B  | 120.33(8)  |
| C48-Er1-H9B | 99.29(9)   | C17-S1-C8   | 95.6(2)    |
| C9-S2-C17   | 95.9(2)    | C33-S3-C32  | 95.90(17)  |
| C34-S4-C32  | 96.15(17)  | C1-O1-Er1   | 163.9(6)   |
| C1-O2-H2    | 109.5      | C16-O3-Er1  | 135.3(3)   |
| C16-O4-Er1  | 142.3(3)   | C41-O5-Er1  | 179.5(4)   |
| C41-O6-Er1  | 110.7(3)   | C48-O7-Er1  | 89.7(3)    |
| C48-O8-Er1  | 94.8(3)    | Er1-O9W-H9A | 163.7(5)   |

|             |          |             |          |
|-------------|----------|-------------|----------|
| Er1-O9W-H9B | 77.8(3)  | H9A-O9W-H9B | 103.3(6) |
| O1-C1-O2    | 116.9(8) | O1-C1-C2    | 124.5(8) |
| O2-C1-C2    | 118.6(7) | C3-C2-C7    | 119.0(6) |
| C3-C2-C1    | 115.8(6) | C7-C2-C1    | 125.0(7) |
| C2-C3-C4    | 120.6(5) | C2-C3-H3    | 119.7    |
| C4-C3-H3    | 119.7    | C5-C4-C3    | 120.4(5) |
| C5-C4-H4    | 119.8    | C3-C4-H4    | 119.8    |
| C6-C5-C4    | 118.5(5) | C6-C5-C8    | 119.6(4) |
| C4-C5-C8    | 121.8(5) | C5-C6-C7    | 120.4(6) |
| C5-C6-H6    | 119.8    | C7-C6-H6    | 119.8    |
| C6-C7-C2    | 120.8(7) | C6-C7-H7    | 119.6    |
| C2-C7-H7    | 119.6    | C9-C8-C5    | 126.9(4) |
| C9-C8-S1    | 115.9(3) | C5-C8-S1    | 117.0(3) |
| C8-C9-C10   | 129.4(4) | C8-C9-S2    | 117.1(3) |
| C10-C9-S2   | 113.3(3) | C11-C10-C15 | 119.6(4) |
| C11-C10-C9  | 121.3(4) | C15-C10-C9  | 118.8(4) |
| C10-C11-C12 | 119.9(4) | C10-C11-H11 | 120.1    |
| C12-C11-H11 | 120.1    | C13-C12-C11 | 120.3(4) |
| C13-C12-H12 | 119.9    | C11-C12-H12 | 119.9    |
| C14-C13-C12 | 119.8(4) | C14-C13-C16 | 119.2(4) |
| C12-C13-C16 | 120.9(4) | C13-C14-C15 | 120.1(4) |
| C13-C14-H14 | 120.0    | C15-C14-H14 | 120.0    |
| C10-C15-C14 | 120.3(4) | C10-C15-H15 | 119.8    |
| C14-C15-H15 | 119.8    | O4-C16-O3   | 127.3(4) |
| O4-C16-C13  | 115.4(4) | O3-C16-C13  | 117.3(4) |
| C18-C17-S1  | 124.6(3) | C18-C17-S2  | 123.8(3) |
| S1-C17-S2   | 111.5(2) | C17-C18-C19 | 122.5(4) |

|             |          |             |          |
|-------------|----------|-------------|----------|
| C17-C18-C27 | 122.5(4) | C19-C18-C27 | 114.4(3) |
| C20-C19-C24 | 119.0(4) | C20-C19-C18 | 123.8(4) |
| C24-C19-C18 | 117.2(3) | C21-C20-C19 | 120.8(4) |
| C21-C20-H20 | 119.6    | C19-C20-H20 | 119.6    |
| C22-C21-C20 | 120.2(4) | C22-C21-H21 | 119.9    |
| C20-C21-H21 | 119.9    | C21-C22-C23 | 120.1(4) |
| C21-C22-H22 | 120.0    | C23-C22-H22 | 120.0    |
| C22-C23-C24 | 120.3(4) | C22-C23-H23 | 119.8    |
| C24-C23-H23 | 119.8    | C23-C24-C19 | 119.6(3) |
| C23-C24-C25 | 123.5(3) | C19-C24-C25 | 116.9(3) |
| C32-C25-C26 | 123.0(3) | C32-C25-C24 | 122.3(3) |
| C26-C25-C24 | 114.2(3) | C31-C26-C27 | 119.2(3) |
| C31-C26-C25 | 123.4(3) | C27-C26-C25 | 117.3(3) |
| C28-C27-C26 | 119.6(4) | C28-C27-C18 | 123.7(4) |
| C26-C27-C18 | 116.6(3) | C29-C28-C27 | 120.8(4) |
| C29-C28-H28 | 119.6    | C27-C28-H28 | 119.6    |
| C28-C29-C30 | 119.7(4) | C28-C29-H29 | 120.2    |
| C30-C29-H29 | 120.2    | C31-C30-C29 | 120.1(4) |
| C31-C30-H30 | 119.9    | C29-C30-H30 | 119.9    |
| C30-C31-C26 | 120.5(4) | C30-C31-H31 | 119.8    |
| C26-C31-H31 | 119.8    | C25-C32-S4  | 123.6(3) |
| C25-C32-S3  | 123.9(3) | S4-C32-S3   | 112.3(2) |
| C34-C33-C35 | 124.5(3) | C34-C33-S3  | 116.7(3) |
| C35-C33-S3  | 118.6(3) | C33-C34-C42 | 126.4(3) |
| C33-C34-S4  | 116.7(3) | C42-C34-S4  | 116.8(3) |
| C40-C35-C36 | 119.5(3) | C40-C35-C33 | 120.6(3) |
| C36-C35-C33 | 119.7(3) | C37-C36-C35 | 120.1(4) |

|               |           |               |           |
|---------------|-----------|---------------|-----------|
| C37-C36-H36   | 119.9     | C35-C36-H36   | 119.9     |
| C36-C37-C38   | 120.4(4)  | C36-C37-H37   | 119.8     |
| C38-C37-H37   | 119.8     | C39-C38-C37   | 119.7(3)  |
| C39-C38-C41   | 121.0(4)  | C37-C38-C41   | 119.3(4)  |
| C38-C39-C40   | 119.9(3)  | C38-C39-H39   | 120.0     |
| C40-C39-H39   | 120.0     | C39-C40-C35   | 120.0(4)  |
| C39-C40-H40   | 120.0     | C35-C40-H40   | 120.0     |
| O5-C41-O6     | 123.1(4)  | O5-C41-C38    | 118.8(4)  |
| O6-C41-C38    | 118.2(4)  | C43-C42-C47   | 118.8(4)  |
| C43-C42-C34   | 120.9(4)  | C47-C42-C34   | 120.3(4)  |
| C44-C43-C42   | 120.2(4)  | C44-C43-H43   | 119.9     |
| C42-C43-H43   | 119.9     | C45-C44-C43   | 119.9(4)  |
| C45-C44-H44   | 120.0     | C43-C44-H44   | 120.0     |
| C46-C45-C44   | 120.0(4)  | C46-C45-C48   | 120.8(4)  |
| C44-C45-C48   | 119.1(4)  | C45-C46-C47   | 120.6(4)  |
| C45-C46-H46   | 119.7     | C47-C46-H46   | 119.7     |
| C46-C47-C42   | 120.4(4)  | C46-C47-H47   | 119.8     |
| C42-C47-H47   | 119.8     | O8-C48-O7     | 121.2(4)  |
| O8-C48-C45    | 119.4(4)  | O7-C48-C45    | 119.4(4)  |
| O8-C48-Er1    | 58.4(2)   | O7-C48-Er1    | 63.0(2)   |
| C45-C48-Er1   | 173.7(4)  | C52-N49-C51   | 114.0(13) |
| C52-N49-C50   | 126.2(11) | C51-N49-C50   | 119.7(9)  |
| N49-C50-H50A  | 109.5     | N49-C50-H50B  | 109.5     |
| H50A-C50-H50B | 109.5     | N49-C50-H50C  | 109.5     |
| H50A-C50-H50C | 109.5     | H50B-C50-H50C | 109.5     |
| N49-C51-H51A  | 109.5     | N49-C51-H51B  | 109.5     |
| H51A-C51-H51B | 109.5     | N49-C51-H51C  | 109.5     |

|                    |           |                    |           |
|--------------------|-----------|--------------------|-----------|
| H51A-C51-H51C      | 109.5     | H51B-C51-H51C      | 109.5     |
| O53-C52-N49        | 122.0(14) | O53-C52-H52        | 119.0     |
| N49-C52-H52        | 119.0     | C57-N54-C55        | 126.5(11) |
| C57-N54-C56        | 113.8(9)  | C55-N54-C56        | 119.7(11) |
| N54-C55-H55A       | 109.5     | N54-C55-H55B       | 109.5     |
| H55A-C55-H55B      | 109.5     | N54-C55-H55C       | 109.5     |
| H55A-C55-H55C      | 109.5     | H55B-C55-H55C      | 109.5     |
| O58-C57-N54        | 124.3(12) | O58-C57-H57        | 117.9     |
| N54-C57-H57        | 117.9     | N54-C56-H56A       | 109.5     |
| N54-C56-H56B       | 109.5     | H56A-C56-H56B      | 109.5     |
| N54-C56-H56C       | 109.5     | H56A-C56-H56C      | 109.5     |
| H56B-C56-H56C      | 109.5     | C62-N59-C60        | 121.5(11) |
| C62-N59-C61        | 113.0(15) | C60-N59-C61        | 124.2(14) |
| N59-C60-H60A       | 109.5     | N59-C60-H60B       | 109.5     |
| H60A-C60-H60B      | 109.5     | N59-C60-H60C       | 109.5     |
| H60A-C60-H60C      | 109.5     | H60B-C60-H60C      | 109.5     |
| O63-C62-N59        | 119.6(11) | O63-C62-H62        | 120.2     |
| N59-C62-H62        | 120.2     | N59-C61-H61A       | 109.5     |
| N59-C61-H61B       | 109.5     | H61A-C61-H61B      | 109.5     |
| N59-C61-H61C       | 109.5     | H61A-C61-H61C      | 109.5     |
| H61B-C61-H61C      | 109.5     | H10A-O10W-<br>H10B | 129.6(10) |
| H11B-O11W-<br>H11A | 115.5(12) | N64B-C65B-H65A     | 109.5     |
| N64B-C65B-H65B     | 109.5     | H65A-C65B-H65B     | 109.5     |
| N64B-C65B-H65C     | 109.5     | H65A-C65B-H65C     | 109.5     |
| H65B-C65B-H65C     | 109.5     | N64B-C66B-H66A     | 109.5     |
| N64B-C66B-H66B     | 109.5     | H66A-C66B-H66B     | 109.5     |

|                    |            |                    |           |
|--------------------|------------|--------------------|-----------|
| N64B-C66B-H66C     | 109.5      | H66A-C66B-H66C     | 109.5     |
| H66B-C66B-H66C     | 109.5      | O68B-C67B-N64B     | 143.5(9)  |
| O68B-C67B-H67B     | 108.2      | N64B-C67B-H67B     | 108.2     |
| C65B-N64B-C67B     | 97.1(12)   | C65B-N64B-C66B     | 131.9(12) |
| C67B-N64B-C66B     | 130.936(4) | N64A-C65A-H65D     | 109.5     |
| N64A-C65A-H65E     | 109.5      | H65D-C65A-H65E     | 109.5     |
| N64A-C65A-H65F     | 109.5      | H65D-C65A-H65F     | 109.5     |
| H65E-C65A-H65F     | 109.5      | O68A-C67A-N64A     | 111.(2)   |
| O68A-C67A-H67A     | 124.7      | N64A-C67A-H67A     | 124.7     |
| C67A-N64A-C66A     | 127.4(19)  | C67A-N64A-C65A     | 115.1(15) |
| C66A-N64A-C65A     | 117.2(17)  | N64A-C66A-H66D     | 109.5     |
| N64A-C66A-H66E     | 109.5      | H66D-C66A-H66E     | 109.5     |
| N64A-C66A-H66F     | 109.5      | H66D-C66A-H66F     | 109.5     |
| H66E-C66A-H66F     | 109.5      | H12A-O12W-<br>H12B | 108.(2)   |
| H13A-O13W-<br>H13B | 111.(3)    |                    |           |

**Table S13. Anisotropic atomic displacement parameters ( $\text{\AA}^2$ ) for Er-MOF.**

The anisotropic atomic displacement factor exponent takes the form: -  
 $2\pi^2 [ h^2 a^{*2} U_{11} + \dots + 2 h k a^* b^* U_{12} ]$

|     | $U_{11}$    | $U_{22}$    | $U_{33}$   | $U_{23}$   | $U_{13}$   | $U_{12}$   |
|-----|-------------|-------------|------------|------------|------------|------------|
| Er1 | 0.02165(10) | 0.02083(10) | 0.01591(9) | 0.00433(6) | 0.00193(6) | 0.00978(6) |
| S1  | 0.0222(4)   | 0.0417(6)   | 0.0432(6)  | -0.0300(5) | 0.0104(4)  | -0.0131(4) |
| S2  | 0.0229(4)   | 0.0290(5)   | 0.0241(4)  | -0.0128(4) | 0.0021(3)  | -0.0034(4) |
| S3  | 0.0165(4)   | 0.0189(4)   | 0.0226(4)  | -0.0008(3) | -0.0042(3) | -0.0050(3) |
| S4  | 0.0163(4)   | 0.0217(4)   | 0.0258(4)  | 0.0021(3)  | -0.0048(3) | -0.0066(3) |



|     | $U_{11}$   | $U_{22}$   | $U_{33}$   | $U_{23}$           | $U_{13}$           | $U_{12}$           |
|-----|------------|------------|------------|--------------------|--------------------|--------------------|
| O1  | 0.084(3)   | 0.128(5)   | 0.056(3)   | -0.068(3)          | 0.028(2)           | -0.073(3)          |
| O2  | 0.099(5)   | 0.151(6)   | 0.106(5)   | -0.059(5)          | -0.054(4)          | 0.017(4)           |
| O3  | 0.0255(14) | 0.0374(16) | 0.0205(13) | $\bar{0.0111(12)}$ | $\bar{0.0026(11)}$ | $\bar{0.0049(12)}$ |
| O4  | 0.0254(15) | 0.054(2)   | 0.0296(16) | $\bar{0.0166(15)}$ | $\bar{0.0088(12)}$ | $\bar{0.0164(14)}$ |
| O5  | 0.0244(15) | 0.072(3)   | 0.0169(14) | $\bar{0.0056(15)}$ | $\bar{0.0091(11)}$ | $\bar{0.0013(15)}$ |
| O6  | 0.0374(18) | 0.0324(17) | 0.0266(16) | $\bar{0.0064(13)}$ | $\bar{0.0027(13)}$ | $\bar{0.0003(14)}$ |
| O7  | 0.0383(17) | 0.0343(16) | 0.0297(16) | $\bar{0.0018(13)}$ | $\bar{0.0004(13)}$ | $\bar{0.0196(14)}$ |
| O8  | 0.0235(16) | 0.052(2)   | 0.072(3)   | 0.039(2)           | $\bar{0.0160(17)}$ | $\bar{0.0180(16)}$ |
| O9W | 0.078(4)   | 0.052(3)   | 0.087(4)   | -0.022(3)          | -0.018(3)          | -0.003(3)          |
| C1  | 0.064(4)   | 0.114(6)   | 0.093(5)   | -0.069(5)          | -0.037(4)          | 0.015(4)           |
| C2  | 0.058(4)   | 0.110(6)   | 0.124(7)   | -0.099(6)          | -0.053(5)          | 0.034(4)           |
| C3  | 0.033(2)   | 0.072(4)   | 0.081(4)   | -0.063(4)          | -0.007(3)          | -0.007(2)          |
| C4  | 0.034(2)   | 0.050(3)   | 0.060(3)   | -0.040(3)          | 0.001(2)           | -0.011(2)          |
| C5  | 0.024(2)   | 0.052(3)   | 0.059(3)   | -0.041(3)          | -0.006(2)          | $\bar{0.0029(19)}$ |
| C6  | 0.066(4)   | 0.081(4)   | 0.103(5)   | -0.075(4)          | -0.048(4)          | 0.031(3)           |
| C7  | 0.087(5)   | 0.093(5)   | 0.106(6)   | -0.077(5)          | -0.060(4)          | 0.041(4)           |
| C8  | 0.0244(19) | 0.036(2)   | 0.035(2)   | $\bar{0.0239(18)}$ | $\bar{0.0050(16)}$ | $\bar{0.0093(16)}$ |
| C9  | 0.0232(18) | 0.0292(19) | 0.0258(19) | $\bar{0.0142(16)}$ | $\bar{0.0035(14)}$ | $\bar{0.0072(15)}$ |
| C10 | 0.0197(16) | 0.0299(19) | 0.0229(17) | $\bar{0.0122(15)}$ | $\bar{0.0018(14)}$ | $\bar{0.0057(14)}$ |
| C11 | 0.035(2)   | 0.032(2)   | 0.033(2)   | $\bar{0.0160(18)}$ | $\bar{0.0136(18)}$ | $\bar{0.0147(18)}$ |

|     | $U_{11}$   | $U_{22}$   | $U_{33}$   | $U_{23}$           | $U_{13}$           | $U_{12}$           |
|-----|------------|------------|------------|--------------------|--------------------|--------------------|
| C12 | 0.034(2)   | 0.031(2)   | 0.032(2)   | $\bar{0.0170(18)}$ | $\bar{0.0087(17)}$ | $\bar{0.0080(17)}$ |
| C13 | 0.0200(17) | 0.036(2)   | 0.0206(17) | $\bar{0.0109(16)}$ | $\bar{0.0008(14)}$ | $\bar{0.0065(15)}$ |
| C14 | 0.041(2)   | 0.033(2)   | 0.030(2)   | $\bar{0.0115(18)}$ | $\bar{0.0116(19)}$ | $\bar{0.0161(19)}$ |
| C15 | 0.039(2)   | 0.029(2)   | 0.034(2)   | $\bar{0.0139(18)}$ | $\bar{0.0085(19)}$ | $\bar{0.0119(18)}$ |
| C16 | 0.0213(17) | 0.038(2)   | 0.0176(17) | $\bar{0.0094(16)}$ | $\bar{0.0014(14)}$ | $\bar{0.0040(15)}$ |
| C17 | 0.0218(17) | 0.0236(17) | 0.0261(18) | $\bar{0.0112(15)}$ | $\bar{0.0063(14)}$ | $\bar{0.0083(14)}$ |
| C18 | 0.0240(17) | 0.0174(16) | 0.0221(17) | $\bar{0.0059(13)}$ | $\bar{0.0033(14)}$ | $\bar{0.0064(13)}$ |
| C19 | 0.0248(18) | 0.0206(17) | 0.0179(16) | $\bar{0.0051(13)}$ | $\bar{0.0013(13)}$ | $\bar{0.0056(14)}$ |
| C20 | 0.032(2)   | 0.0202(17) | 0.0239(18) | $\bar{0.0067(14)}$ | $\bar{0.0028(15)}$ | $\bar{0.0015(15)}$ |
| C21 | 0.031(2)   | 0.0255(19) | 0.029(2)   | $\bar{0.0089(16)}$ | $\bar{0.0095(16)}$ | $\bar{0.0040(16)}$ |
| C22 | 0.0264(19) | 0.031(2)   | 0.028(2)   | $\bar{0.0066(16)}$ | $\bar{0.0102(16)}$ | $\bar{0.0023(16)}$ |
| C23 | 0.0253(18) | 0.0213(17) | 0.0228(17) | $\bar{0.0047(14)}$ | $\bar{0.0060(14)}$ | $\bar{0.0034(14)}$ |
| C24 | 0.0213(16) | 0.0197(16) | 0.0168(15) | $\bar{0.0037(13)}$ | $\bar{0.0015(13)}$ | $\bar{0.0042(13)}$ |
| C25 | 0.0186(16) | 0.0187(16) | 0.0197(16) | $\bar{0.0057(13)}$ | $\bar{0.0024(13)}$ | $\bar{0.0049(13)}$ |
| C26 | 0.0203(16) | 0.0205(16) | 0.0162(15) | $\bar{0.0046(13)}$ | $\bar{0.0010(12)}$ | $\bar{0.0078(13)}$ |
| C27 | 0.0254(18) | 0.0210(17) | 0.0195(16) | $\bar{0.0076(13)}$ | $\bar{0.0044(14)}$ | $\bar{0.0084(14)}$ |

|     | $U_{11}$   | $U_{22}$   | $U_{33}$   | $U_{23}$           | $U_{13}$           | $U_{12}$           |
|-----|------------|------------|------------|--------------------|--------------------|--------------------|
| C28 | 0.031(2)   | 0.0254(19) | 0.032(2)   | $\bar{0.0128(16)}$ | $\bar{0.0091(16)}$ | $\bar{0.0142(16)}$ |
| C29 | 0.028(2)   | 0.034(2)   | 0.039(2)   | $\bar{0.0170(19)}$ | $\bar{0.0125(18)}$ | $\bar{0.0154(17)}$ |
| C30 | 0.0247(19) | 0.029(2)   | 0.032(2)   | $\bar{0.0157(17)}$ | $\bar{0.0072(16)}$ | $\bar{0.0084(15)}$ |
| C31 | 0.0228(17) | 0.0219(17) | 0.0220(17) | $\bar{0.0077(14)}$ | $\bar{0.0004(14)}$ | $\bar{0.0061(14)}$ |
| C32 | 0.0161(15) | 0.0188(16) | 0.0208(16) | $\bar{0.0036(13)}$ | $\bar{0.0038(12)}$ | $\bar{0.0049(12)}$ |
| C33 | 0.0211(16) | 0.0198(16) | 0.0196(16) | $\bar{0.0007(13)}$ | $\bar{0.0068(13)}$ | $\bar{0.0074(13)}$ |
| C34 | 0.0212(17) | 0.0201(16) | 0.0207(17) | $\bar{0.0001(13)}$ | $\bar{0.0058(13)}$ | $\bar{0.0083(13)}$ |
| C35 | 0.0183(15) | 0.0221(17) | 0.0177(16) | $\bar{0.0021(13)}$ | $\bar{0.0045(13)}$ | $\bar{0.0050(13)}$ |
| C36 | 0.0290(19) | 0.0222(18) | 0.0250(18) | $\bar{0.0025(15)}$ | $\bar{0.0120(15)}$ | $\bar{0.0069(15)}$ |
| C37 | 0.0300(19) | 0.0221(17) | 0.0232(18) | $\bar{0.0023(14)}$ | $\bar{0.0090(15)}$ | $\bar{0.0065(15)}$ |
| C38 | 0.0200(16) | 0.0273(18) | 0.0154(15) | $\bar{0.0030(14)}$ | $\bar{0.0037(13)}$ | $\bar{0.0027(14)}$ |
| C39 | 0.0196(16) | 0.035(2)   | 0.0190(17) | $\bar{0.0056(15)}$ | $\bar{0.0063(13)}$ | $\bar{0.0080(15)}$ |
| C40 | 0.0197(16) | 0.0269(18) | 0.0207(17) | $\bar{0.0044(14)}$ | $\bar{0.0038(13)}$ | $\bar{0.0089(14)}$ |
| C41 | 0.0222(18) | 0.038(2)   | 0.0163(17) | $\bar{0.0011(16)}$ | $\bar{0.0024(14)}$ | $\bar{0.0020(16)}$ |
| C42 | 0.0196(16) | 0.0233(17) | 0.0242(18) | $\bar{0.0013(14)}$ | $\bar{0.0032(14)}$ | $\bar{0.0087(14)}$ |
| C43 | 0.030(2)   | 0.039(2)   | 0.025(2)   | $\bar{0.0042(17)}$ | $\bar{0.0031(16)}$ | $\bar{0.0194(18)}$ |

|      | <b>U<sub>11</sub></b> | <b>U<sub>22</sub></b> | <b>U<sub>33</sub></b> | <b>U<sub>23</sub></b> | <b>U<sub>13</sub></b> | <b>U<sub>12</sub></b> |
|------|-----------------------|-----------------------|-----------------------|-----------------------|-----------------------|-----------------------|
| C44  | 0.033(2)              | 0.038(2)              | 0.026(2)              | 0.0009(17)            | 0.0025(17)            | 0.0181(19)            |
| C45  | 0.0222(18)            | 0.0256(19)            | 0.033(2)              | 0.0041(16)            | 0.0011(16)            | 0.0096(15)            |
| C46  | 0.026(2)              | 0.035(2)              | 0.042(3)              | 0.0073(19)            | 0.0117(18)            | 0.0166(18)            |
| C47  | 0.0268(19)            | 0.033(2)              | 0.031(2)              | 0.0044(17)            | 0.0108(16)            | 0.0151(17)            |
| C48  | 0.0222(19)            | 0.027(2)              | 0.044(3)              | 0.0084(18)            | 0.0010(18)            | 0.0087(16)            |
| N49  | 0.020(3)              | 0.068(6)              | 0.041(4)              | 0.012(4)              | -0.014(3)             | -0.030(4)             |
| C50  | 0.051(6)              | 0.039(5)              | 0.042(5)              | 0.011(4)              | -0.026(5)             | -0.030(5)             |
| C51  | 0.029(5)              | 0.097(11)             | 0.072(9)              | -0.042(8)             | 0.010(5)              | -0.021(6)             |
| C52  | 0.052(5)              | 0.070(5)              | 0.060(5)              | -0.011(4)             | -0.020(4)             | -0.027(4)             |
| O53  | 0.040(4)              | 0.087(6)              | 0.081(6)              | 0.004(5)              | -0.027(4)             | -0.028(4)             |
| N54  | 0.008(2)              | 0.021(3)              | 0.048(4)              | -0.025(3)             | -0.001(2)             | 0.006(2)              |
| C55  | 0.037(5)              | 0.057(6)              | 0.101(8)              | -0.036(6)             | 0.024(5)              | -0.022(5)             |
| C57  | 0.044(4)              | 0.037(4)              | 0.055(4)              | -0.024(3)             | -0.015(3)             | 0.004(3)              |
| C56  | 0.041(5)              | 0.028(4)              | 0.075(6)              | -0.032(4)             | -0.028(5)             | 0.017(3)              |
| O58  | 0.090(7)              | 0.046(5)              | 0.115(8)              | -0.027(5)             | 0.009(6)              | -0.037(5)             |
| N59  | 0.121(11)             | 0.039(5)              | 0.027(4)              | -0.003(4)             | -0.024(6)             | -0.014(6)             |
| C60  | 0.053(7)              | 0.114(13)             | 0.037(6)              | -0.039(7)             | -0.009(5)             | -0.002(8)             |
| C62  | 0.046(5)              | 0.052(6)              | 0.022(4)              | -0.005(4)             | -0.008(4)             | -0.017(5)             |
| C61  | 0.114(11)             | 0.090(9)              | 0.104(10)             | -0.038(8)             | -0.003(8)             | -0.018(8)             |
| O63  | 0.050(5)              | 0.061(6)              | 0.055(5)              | -0.012(4)             | -0.015(4)             | -0.012(4)             |
| O10W | 0.006(3)              | 0.017(3)              | 0.005(3)              | -0.002(2)             | 0.000(2)              | 0.000(2)              |
| O11W | 0.010(4)              | 0.023(5)              | 0.019(5)              | 0.003(4)              | -0.004(4)             | 0.000(4)              |
| C65B | 0.069(5)              | 0.061(5)              | 0.066(5)              | -0.023(4)             | -0.007(5)             | -0.012(5)             |
| O68B | 0.067(4)              | 0.049(4)              | 0.055(4)              | -0.027(3)             | -0.006(4)             | -0.012(3)             |

|      | $U_{11}$  | $U_{22}$ | $U_{33}$  | $U_{23}$  | $U_{13}$   | $U_{12}$  |
|------|-----------|----------|-----------|-----------|------------|-----------|
| C66B | 0.068(5)  | 0.060(5) | 0.065(5)  | -0.023(4) | -0.004(4)  | -0.015(4) |
| C67B | 0.059(3)  | 0.049(3) | 0.055(3)  | -0.024(2) | -0.006(2)  | -0.013(2) |
| N64B | 0.063(3)  | 0.053(3) | 0.059(3)  | -0.024(2) | -0.005(2)  | -0.012(2) |
| C65A | 0.053(5)  | 0.047(4) | 0.051(4)  | -0.025(4) | -0.012(4)  | -0.014(4) |
| C67A | 0.060(3)  | 0.049(3) | 0.054(3)  | -0.026(2) | -0.008(2)  | -0.014(2) |
| N64A | 0.058(3)  | 0.043(3) | 0.052(3)  | -0.029(2) | -0.008(2)  | -0.016(2) |
| C66A | 0.061(4)  | 0.049(4) | 0.055(4)  | -0.023(4) | -0.004(4)  | -0.015(4) |
| O68A | 0.074(5)  | 0.062(4) | 0.068(4)  | -0.024(4) | -0.006(4)  | -0.012(4) |
| O12W | 0.081(11) | 0.025(6) | 0.052(9)  | 0.004(6)  | -0.032(8)  | 0.000(7)  |
| O13W | 0.080(12) | 0.048(9) | 0.078(11) | -0.034(8) | -0.033(10) | 0.010(8)  |

**Table S14. Hydrogen atomic coordinates and isotropic atomic displacement parameters ( $\text{\AA}^2$ ) for Er-MOF.**

|     | x/a     | y/b     | z/c     | U(eq) |
|-----|---------|---------|---------|-------|
| H2  | -0.1107 | 0.2792  | 0.0802  | 0.177 |
| H9A | -0.1594 | 0.3156  | -0.0374 | 0.09  |
| H9B | -0.1432 | 0.2173  | -0.0268 | 0.09  |
| H3  | 0.1920  | 0.0779  | 0.1677  | 0.062 |
| H4  | 0.3022  | 0.0319  | 0.2672  | 0.05  |
| H6  | 0.1394  | 0.2757  | 0.2987  | 0.089 |
| H7  | 0.0201  | 0.3159  | 0.2056  | 0.106 |
| H11 | 0.5196  | -0.0487 | 0.3000  | 0.041 |
| H12 | 0.6658  | -0.0753 | 0.2004  | 0.039 |
| H14 | 0.7174  | 0.1833  | 0.1349  | 0.043 |
| H15 | 0.5612  | 0.2140  | 0.2286  | 0.041 |
| H20 | 0.5970  | 0.0620  | 0.5347  | 0.032 |

|      | <b>x/a</b> | <b>y/b</b> | <b>z/c</b> | <b>U(eq)</b> |
|------|------------|------------|------------|--------------|
| H21  | 0.7747     | 0.0811     | 0.5562     | 0.037        |
| H22  | 0.7810     | 0.2235     | 0.5580     | 0.036        |
| H23  | 0.6087     | 0.3487     | 0.5372     | 0.029        |
| H28  | 0.1591     | 0.1503     | 0.5732     | 0.035        |
| H29  | -0.0120    | 0.2404     | 0.6236     | 0.041        |
| H30  | -0.0045    | 0.3853     | 0.6216     | 0.034        |
| H31  | 0.1716     | 0.4414     | 0.5660     | 0.027        |
| H36  | 0.3527     | 0.7781     | 0.3001     | 0.031        |
| H37  | 0.2673     | 0.9052     | 0.2023     | 0.031        |
| H39  | 0.0870     | 0.7467     | 0.1703     | 0.03         |
| H40  | 0.1748     | 0.6178     | 0.2678     | 0.027        |
| H43  | 0.4751     | 0.6414     | 0.1905     | 0.037        |
| H44  | 0.6050     | 0.7276     | 0.0966     | 0.041        |
| H46  | 0.8031     | 0.6960     | 0.2528     | 0.044        |
| H47  | 0.6689     | 0.6177     | 0.3474     | 0.038        |
| H50A | -0.1193    | 0.0505     | 0.2429     | 0.065        |
| H50B | 0.0138     | -0.0101    | 0.2635     | 0.065        |
| H50C | -0.1039    | -0.0508    | 0.3063     | 0.065        |
| H51A | -0.1972    | 0.1621     | 0.2860     | 0.095        |
| H51B | -0.2304    | 0.1316     | 0.3752     | 0.095        |
| H51C | -0.1165    | 0.1775     | 0.3338     | 0.095        |
| H52  | -0.0451    | 0.0421     | 0.4341     | 0.071        |
| H55A | -0.1166    | 0.3209     | 0.4379     | 0.099        |
| H55B | -0.2103    | 0.4005     | 0.3842     | 0.099        |
| H55C | -0.1190    | 0.3187     | 0.3573     | 0.099        |
| H57  | -0.0851    | 0.4796     | 0.2525     | 0.054        |

|      | <b>x/a</b> | <b>y/b</b> | <b>z/c</b> | <b>U(eq)</b> |
|------|------------|------------|------------|--------------|
| H56A | 0.0302     | 0.3604     | 0.4502     | 0.069        |
| H56B | 0.1278     | 0.3855     | 0.3766     | 0.069        |
| H56C | 0.0336     | 0.4667     | 0.4031     | 0.069        |
| H60A | -0.6437    | 0.2902     | 0.0846     | 0.101        |
| H60B | -0.6298    | 0.2331     | 0.0311     | 0.101        |
| H60C | -0.5582    | 0.1871     | 0.1026     | 0.101        |
| H62  | -0.3213    | 0.2580     | -0.0434    | 0.049        |
| H61A | -0.5222    | 0.3986     | 0.0458     | 0.158        |
| H61B | -0.3805    | 0.3461     | 0.0438     | 0.158        |
| H61C | -0.4362    | 0.4088     | -0.0328    | 0.158        |
| H10A | 0.5327     | 1.0257     | -0.1193    | 0.013        |
| H10B | 0.4906     | 0.9807     | -0.0305    | 0.013        |
| H11B | 0.4446     | 0.9770     | -0.0384    | 0.025        |
| H11A | 0.4891     | 0.9943     | 0.0158     | 0.025        |
| H65A | 0.6323     | 0.4912     | 0.1206     | 0.099        |
| H65B | 0.5486     | 0.4263     | 0.1248     | 0.099        |
| H65C | 0.4894     | 0.5147     | 0.1506     | 0.099        |
| H66A | 0.6800     | 0.3420     | 0.3125     | 0.097        |
| H66B | 0.7651     | 0.3486     | 0.2340     | 0.097        |
| H66C | 0.7141     | 0.4383     | 0.2585     | 0.097        |
| H67B | 0.4557     | 0.3641     | 0.2130     | 0.063        |
| H65D | 0.2891     | 0.4220     | 0.2617     | 0.069        |
| H65E | 0.3472     | 0.3159     | 0.3081     | 0.069        |
| H65F | 0.3270     | 0.3953     | 0.3424     | 0.069        |
| H67A | 0.5511     | 0.2970     | 0.3513     | 0.062        |
| H66D | 0.4038     | 0.4831     | 0.1695     | 0.081        |

|      | x/a     | y/b    | z/c     | U(eq) |
|------|---------|--------|---------|-------|
| H66E | 0.5253  | 0.5010 | 0.1806  | 0.081 |
| H66F | 0.5340  | 0.4168 | 0.1543  | 0.081 |
| H12A | -0.0819 | 0.4221 | -0.1340 | 0.069 |
| H12B | -0.1681 | 0.3783 | -0.1334 | 0.069 |
| H13A | -0.0819 | 0.4221 | -0.1340 | 0.08  |
| H13B | 0.0001  | 0.4236 | -0.0822 | 0.08  |

**Table S15. Sample and crystal data for Eu-MOF.**

|                               |                                                                                       |                  |  |
|-------------------------------|---------------------------------------------------------------------------------------|------------------|--|
| <b>Identification code</b>    | Q_0981_Monica_137Eu                                                                   |                  |  |
| <b>Chemical formula</b>       | C <sub>54</sub> H <sub>43.50</sub> EuN <sub>2</sub> O <sub>12.25</sub> S <sub>4</sub> |                  |  |
| <b>Formula weight</b>         | 1196.61 g/mol                                                                         |                  |  |
| <b>Temperature</b>            | 163(2) K                                                                              |                  |  |
| <b>Wavelength</b>             | 0.71073 Å                                                                             |                  |  |
| <b>Crystal size</b>           | 0.170 x 0.180 x 0.220 mm                                                              |                  |  |
| <b>Crystal system</b>         | triclinic                                                                             |                  |  |
| <b>Space group</b>            | P -1                                                                                  |                  |  |
| <b>Unit cell dimensions</b>   | a = 11.6915(6) Å                                                                      | α = 66.8521(13)° |  |
|                               | b = 16.0431(8) Å                                                                      | β = 76.8187(14)° |  |
|                               | c = 19.7816(10) Å                                                                     | γ = 71.4086(14)° |  |
| <b>Volume</b>                 | 3211.1(3) Å <sup>3</sup>                                                              |                  |  |
| <b>Z</b>                      | 2                                                                                     |                  |  |
| <b>Density (calculated)</b>   | 1.238 g/cm <sup>3</sup>                                                               |                  |  |
| <b>Absorption coefficient</b> | 1.159 mm <sup>-1</sup>                                                                |                  |  |
| <b>F(000)</b>                 | 1213                                                                                  |                  |  |



**Table S16. Data collection and structure refinement for Eu-MOF.**

|                                         |                                                                                                                                                                |                              |
|-----------------------------------------|----------------------------------------------------------------------------------------------------------------------------------------------------------------|------------------------------|
| <b>Theta range for data collection</b>  | 3.08 to 28.34°                                                                                                                                                 |                              |
| <b>Index ranges</b>                     | -15<=h<=15, -21<=k<=21, -26<=l<=26                                                                                                                             |                              |
| <b>Reflections collected</b>            | 105127                                                                                                                                                         |                              |
| <b>Independent reflections</b>          | 15974 [R(int) = 0.0321]                                                                                                                                        |                              |
| <b>Max. and min. transmission</b>       | 1.0000 and 0.9409                                                                                                                                              |                              |
| <b>Structure solution technique</b>     | direct methods                                                                                                                                                 |                              |
| <b>Structure solution program</b>       | SHELXT 2014/5 (Sheldrick, 2014)                                                                                                                                |                              |
| <b>Refinement method</b>                | Full-matrix least-squares on F <sup>2</sup>                                                                                                                    |                              |
| <b>Refinement program</b>               | SHELXL-2016/6 (Sheldrick, 2016)                                                                                                                                |                              |
| <b>Function minimized</b>               | $\Sigma w(F_o^2 - F_c^2)^2$                                                                                                                                    |                              |
| <b>Data / restraints / parameters</b>   | 15974 / 381 / 808                                                                                                                                              |                              |
| <b>Goodness-of-fit on F<sup>2</sup></b> | 1.119                                                                                                                                                          |                              |
| <b>Final R indices</b>                  | 14485 data;<br>I>2σ(I)                                                                                                                                         | R1 = 0.0508, wR2 =<br>0.1518 |
|                                         | all data                                                                                                                                                       | R1 = 0.0564, wR2 =<br>0.1564 |
| <b>Weighting scheme</b>                 | w=1/[σ <sup>2</sup> (F <sub>o</sub> <sup>2</sup> )+(0.0831P) <sup>2</sup> +12.9517P]<br>where P=(F <sub>o</sub> <sup>2</sup> +2F <sub>c</sub> <sup>2</sup> )/3 |                              |
| <b>Largest diff. peak and hole</b>      | 2.856 and -1.624 eÅ <sup>-3</sup>                                                                                                                              |                              |
| <b>R.M.S. deviation from mean</b>       | 0.165 eÅ <sup>-3</sup>                                                                                                                                         |                              |

**Table S17. Atomic coordinates and equivalent isotropic atomic displacement parameters (Å<sup>2</sup>) for Eu-MOF.**

U(eq) is defined as one third of the trace of the orthogonalized U<sub>ij</sub> tensor.

|     | <b>x/a</b> | <b>y/b</b> | <b>z/c</b> | <b>U(eq)</b> |
|-----|------------|------------|------------|--------------|
| Eu1 | 0.04693(2) | 0.11614(2) | 0.99149(2) | 0.01677(7)   |

|     | <b>x/a</b>  | <b>y/b</b>  | <b>z/c</b>  | <b>U(eq)</b> |
|-----|-------------|-------------|-------------|--------------|
| S1  | 0.24648(10) | 0.15303(10) | 0.42582(7)  | 0.0317(3)    |
| S2  | 0.51078(9)  | 0.09379(8)  | 0.40941(6)  | 0.0250(2)    |
| S3  | 0.26904(9)  | 0.54007(7)  | 0.41877(6)  | 0.0226(2)    |
| S4  | 0.53400(9)  | 0.47934(7)  | 0.41112(6)  | 0.0219(2)    |
| O1  | 0.0394(4)   | 0.1908(4)   | 0.0755(3)   | 0.0529(11)   |
| O2  | 0.9465(12)  | 0.3126(9)   | 0.0981(7)   | 0.183(4)     |
| O3  | 0.7990(3)   | 0.9789(2)   | 0.07099(18) | 0.0299(7)    |
| O4  | 0.8701(3)   | 0.0908(3)   | 0.0743(2)   | 0.0393(9)    |
| O5  | 0.0589(3)   | 0.9266(2)   | 0.07236(16) | 0.0273(6)    |
| O6  | 0.1701(3)   | 0.0031(2)   | 0.08846(19) | 0.0336(7)    |
| O7  | 0.7748(4)   | 0.8143(3)   | 0.04954(19) | 0.0427(9)    |
| O8  | 0.8939(4)   | 0.7794(3)   | 0.1330(2)   | 0.0587(14)   |
| O9W | 0.8870(6)   | 0.2637(4)   | 0.9564(3)   | 0.0811(19)   |
| C1  | 0.0257(8)   | 0.2356(7)   | 0.1106(6)   | 0.083(3)     |
| C2  | 0.0974(7)   | 0.2102(6)   | 0.1721(5)   | 0.070(2)     |
| C3  | 0.1782(5)   | 0.1252(4)   | 0.1916(3)   | 0.0412(12)   |
| C4  | 0.2483(5)   | 0.0980(4)   | 0.2486(3)   | 0.0390(11)   |
| C5  | 0.2386(4)   | 0.1572(4)   | 0.2859(3)   | 0.0356(11)   |
| C6  | 0.1569(8)   | 0.2443(6)   | 0.2652(5)   | 0.085(3)     |
| C7  | 0.0912(10)  | 0.2728(8)   | 0.2067(6)   | 0.090(3)     |
| C8  | 0.3180(4)   | 0.1333(4)   | 0.3428(3)   | 0.0283(9)    |
| C9  | 0.4394(4)   | 0.1045(3)   | 0.3364(2)   | 0.0265(8)    |
| C10 | 0.5254(4)   | 0.0867(3)   | 0.2724(2)   | 0.0247(8)    |
| C11 | 0.5639(5)   | 0.9992(4)   | 0.2650(3)   | 0.0388(12)   |
| C12 | 0.6500(5)   | 0.9849(4)   | 0.2060(3)   | 0.0371(11)   |
| C13 | 0.6998(4)   | 0.0562(3)   | 0.1564(2)   | 0.0254(8)    |

|     | <b>x/a</b> | <b>y/b</b> | <b>z/c</b> | <b>U(eq)</b> |
|-----|------------|------------|------------|--------------|
| C14 | 0.6629(6)  | 0.1429(4)  | 0.1642(3)  | 0.0450(14)   |
| C15 | 0.5756(6)  | 0.1585(4)  | 0.2219(3)  | 0.0425(13)   |
| C16 | 0.7983(4)  | 0.0403(3)  | 0.0950(3)  | 0.0272(9)    |
| C17 | 0.3795(4)  | 0.1496(3)  | 0.4551(2)  | 0.0222(8)    |
| C18 | 0.3816(4)  | 0.1908(3)  | 0.5024(2)  | 0.0202(7)    |
| C19 | 0.4952(4)  | 0.1962(3)  | 0.5193(2)  | 0.0199(7)    |
| C20 | 0.5973(4)  | 0.1200(3)  | 0.5345(3)  | 0.0276(9)    |
| C21 | 0.7019(4)  | 0.1295(3)  | 0.5500(3)  | 0.0317(10)   |
| C22 | 0.7046(4)  | 0.2144(3)  | 0.5511(3)  | 0.0297(9)    |
| C23 | 0.6042(4)  | 0.2908(3)  | 0.5355(2)  | 0.0235(8)    |
| C24 | 0.4992(4)  | 0.2828(3)  | 0.5190(2)  | 0.0189(7)    |
| C25 | 0.3902(3)  | 0.3614(3)  | 0.5000(2)  | 0.0179(7)    |
| C26 | 0.2741(4)  | 0.3347(3)  | 0.5302(2)  | 0.0195(7)    |
| C27 | 0.2705(4)  | 0.2465(3)  | 0.5332(2)  | 0.0222(8)    |
| C28 | 0.1649(4)  | 0.2158(3)  | 0.5642(3)  | 0.0302(10)   |
| C29 | 0.0636(5)  | 0.2715(4)  | 0.5924(3)  | 0.0390(12)   |
| C30 | 0.0663(4)  | 0.3583(4)  | 0.5893(3)  | 0.0342(10)   |
| C31 | 0.1710(4)  | 0.3899(3)  | 0.5584(2)  | 0.0242(8)    |
| C32 | 0.3966(3)  | 0.4481(3)  | 0.4525(2)  | 0.0181(7)    |
| C33 | 0.3510(4)  | 0.6083(3)  | 0.3425(2)  | 0.0220(8)    |
| C34 | 0.4717(4)  | 0.5805(3)  | 0.3392(2)  | 0.0210(7)    |
| C35 | 0.2826(4)  | 0.6931(3)  | 0.2892(2)  | 0.0226(8)    |
| C36 | 0.3118(4)  | 0.7781(3)  | 0.2687(2)  | 0.0283(9)    |
| C37 | 0.2605(4)  | 0.8554(3)  | 0.2113(2)  | 0.0277(9)    |
| C38 | 0.1774(4)  | 0.8491(3)  | 0.1741(2)  | 0.0224(8)    |
| C39 | 0.1410(4)  | 0.7668(3)  | 0.1978(2)  | 0.0271(9)    |

|      | <b>x/a</b> | <b>y/b</b> | <b>z/c</b> | <b>U(eq)</b> |
|------|------------|------------|------------|--------------|
| C40  | 0.1930(4)  | 0.6886(3)  | 0.2553(2)  | 0.0262(8)    |
| C41  | 0.1327(4)  | 0.9312(3)  | 0.1076(2)  | 0.0239(8)    |
| C42  | 0.5592(4)  | 0.6274(3)  | 0.2820(2)  | 0.0226(8)    |
| C43  | 0.5518(5)  | 0.6497(4)  | 0.2072(3)  | 0.0343(11)   |
| C44  | 0.6283(5)  | 0.6992(4)  | 0.1537(3)  | 0.0377(12)   |
| C45  | 0.7172(4)  | 0.7222(3)  | 0.1738(2)  | 0.0272(9)    |
| C46  | 0.7282(4)  | 0.6963(4)  | 0.2479(3)  | 0.0319(10)   |
| C47  | 0.6494(4)  | 0.6496(3)  | 0.3018(2)  | 0.0300(9)    |
| C48  | 0.8016(4)  | 0.7741(3)  | 0.1152(3)  | 0.0304(9)    |
| N49  | 0.9186(12) | 0.0347(11) | 0.3417(9)  | 0.077(3)     |
| C50  | 0.9354(16) | 0.9980(13) | 0.2892(12) | 0.085(4)     |
| C51  | 0.8465(18) | 0.1258(16) | 0.3358(13) | 0.099(5)     |
| C52  | 0.9622(15) | 0.9975(12) | 0.4089(12) | 0.081(3)     |
| O53  | 0.0200(11) | 0.9134(10) | 0.4266(8)  | 0.091(3)     |
| N54  | 0.9508(12) | 0.3979(9)  | 0.3668(7)  | 0.063(2)     |
| C55  | 0.9086(15) | 0.3398(12) | 0.4206(9)  | 0.069(3)     |
| C57  | 0.8840(15) | 0.4389(11) | 0.2978(10) | 0.069(3)     |
| C56  | 0.0500(12) | 0.4250(10) | 0.3657(9)  | 0.059(3)     |
| O58  | 0.9558(16) | 0.4860(12) | 0.2540(9)  | 0.133(4)     |
| N59  | 0.5017(19) | 0.2725(16) | 0.0128(10) | 0.117(4)     |
| C60  | 0.405(2)   | 0.2366(18) | 0.0565(11) | 0.102(5)     |
| C62  | 0.613(3)   | 0.2487(19) | 0.9706(13) | 0.114(4)     |
| C61  | 0.521(3)   | 0.349(2)   | 0.0203(16) | 0.136(6)     |
| O63  | 0.5928(17) | 0.1743(15) | 0.9736(9)  | 0.127(5)     |
| O10W | 0.5221(15) | 0.0205(13) | 0.9296(10) | 0.048(4)     |
| O11W | 0.4303(14) | 0.0120(16) | 0.9909(12) | 0.067(6)     |

|      | <b>x/a</b> | <b>y/b</b> | <b>z/c</b> | <b>U(eq)</b> |
|------|------------|------------|------------|--------------|
| C65B | 0.624(4)   | 0.455(3)   | 0.1450(11) | 0.119(6)     |
| O68B | 0.413(3)   | 0.367(2)   | 0.3095(12) | 0.101(5)     |
| C66B | 0.695533   | 0.382122   | 0.26015    | 0.118(5)     |
| C67B | 0.473989   | 0.379886   | 0.250361   | 0.113(5)     |
| N64B | 0.58719    | 0.408154   | 0.223593   | 0.114(4)     |
| C65A | 0.348454   | 0.380761   | 0.296206   | 0.109(5)     |
| C67A | 0.584(2)   | 0.355(3)   | 0.276(2)   | 0.112(5)     |
| N64A | 0.4656(18) | 0.401(3)   | 0.2636(18) | 0.112(4)     |
| C66A | 0.442(4)   | 0.464(3)   | 0.1880(17) | 0.110(5)     |
| O68A | 0.675(3)   | 0.368(3)   | 0.2210(19) | 0.118(5)     |
| O12W | 0.040(2)   | 0.4845(13) | 0.9873(12) | 0.064(5)     |
| O13W | 0.9736(12) | 0.4321(9)  | 0.8103(9)  | 0.096(4)     |

**Table S18. Bond lengths (Å) for Eu-MOF.**

|         |           |         |           |
|---------|-----------|---------|-----------|
| Eu1-O5  | 2.352(3)  | Eu1-O4  | 2.365(3)  |
| Eu1-O1  | 2.374(4)  | Eu1-O3  | 2.411(3)  |
| Eu1-O6  | 2.430(3)  | Eu1-O9W | 2.461(5)  |
| Eu1-O8  | 2.463(4)  | Eu1-O7  | 2.499(3)  |
| Eu1-O5  | 2.798(3)  | Eu1-C48 | 2.838(4)  |
| Eu1-C41 | 2.980(4)  | Eu1-Eu1 | 4.0815(4) |
| Eu1-H9B | 2.3535(2) | S1-C17  | 1.757(4)  |
| S1-C8   | 1.763(4)  | S2-C9   | 1.753(5)  |
| S2-C17  | 1.762(4)  | S3-C33  | 1.762(4)  |
| S3-C32  | 1.768(4)  | S4-C32  | 1.758(4)  |
| S4-C34  | 1.759(4)  | O1-C1   | 1.135(8)  |
| O2-C1   | 1.257(13) | O2-H2   | 0.84      |

|         |           |         |           |
|---------|-----------|---------|-----------|
| O3-C16  | 1.246(6)  | O4-C16  | 1.244(6)  |
| O5-C41  | 1.260(5)  | O6-C41  | 1.253(6)  |
| O7-C48  | 1.264(6)  | O8-C48  | 1.246(6)  |
| O9W-H9A | 0.891(6)  | O9W-H9B | 0.942(6)  |
| C1-C2   | 1.486(9)  | C2-C3   | 1.354(9)  |
| C2-C7   | 1.399(12) | C3-C4   | 1.393(8)  |
| C3-H3   | 0.95      | C4-C5   | 1.379(6)  |
| C4-H4   | 0.95      | C5-C6   | 1.382(9)  |
| C5-C8   | 1.478(7)  | C6-C7   | 1.379(12) |
| C6-H6   | 0.95      | C7-H7   | 0.95      |
| C8-C9   | 1.338(6)  | C9-C10  | 1.488(6)  |
| C10-C11 | 1.386(6)  | C10-C15 | 1.389(7)  |
| C11-C12 | 1.400(6)  | C11-H11 | 0.95      |
| C12-C13 | 1.375(6)  | C12-H12 | 0.95      |
| C13-C14 | 1.377(7)  | C13-C16 | 1.513(6)  |
| C14-C15 | 1.392(7)  | C14-H14 | 0.95      |
| C15-H15 | 0.95      | C17-C18 | 1.349(6)  |
| C18-C19 | 1.477(5)  | C18-C27 | 1.478(6)  |
| C19-C20 | 1.397(6)  | C19-C24 | 1.404(5)  |
| C20-C21 | 1.392(7)  | C20-H20 | 0.95      |
| C21-C22 | 1.382(7)  | C21-H21 | 0.95      |
| C22-C23 | 1.387(6)  | C22-H22 | 0.95      |
| C23-C24 | 1.394(6)  | C23-H23 | 0.95      |
| C24-C25 | 1.475(5)  | C25-C32 | 1.353(5)  |
| C25-C26 | 1.477(5)  | C26-C31 | 1.396(6)  |
| C26-C27 | 1.407(5)  | C27-C28 | 1.396(6)  |
| C28-C29 | 1.389(7)  | C28-H28 | 0.95      |

|          |           |          |           |
|----------|-----------|----------|-----------|
| C29-C30  | 1.380(7)  | C29-H29  | 0.95      |
| C30-C31  | 1.392(6)  | C30-H30  | 0.95      |
| C31-H31  | 0.95      | C33-C34  | 1.332(6)  |
| C33-C35  | 1.472(5)  | C34-C42  | 1.478(5)  |
| C35-C36  | 1.392(6)  | C35-C40  | 1.400(6)  |
| C36-C37  | 1.383(6)  | C36-H36  | 0.95      |
| C37-C38  | 1.394(6)  | C37-H37  | 0.95      |
| C38-C39  | 1.388(6)  | C38-C41  | 1.501(6)  |
| C39-C40  | 1.395(6)  | C39-H39  | 0.95      |
| C40-H40  | 0.95      | C42-C47  | 1.390(6)  |
| C42-C43  | 1.396(6)  | C43-C44  | 1.383(6)  |
| C43-H43  | 0.95      | C44-C45  | 1.387(7)  |
| C44-H44  | 0.95      | C45-C46  | 1.382(6)  |
| C45-C48  | 1.501(6)  | C46-C47  | 1.383(6)  |
| C46-H46  | 0.95      | C47-H47  | 0.95      |
| N49-C50  | 1.33(3)   | N49-C52  | 1.37(2)   |
| N49-C51  | 1.41(3)   | C50-H50A | 0.98      |
| C50-H50B | 0.98      | C50-H50C | 0.98      |
| C51-H51A | 0.98      | C51-H51B | 0.98      |
| C51-H51C | 0.98      | C52-O53  | 1.247(15) |
| C52-H52  | 0.95      | N54-C55  | 1.23(2)   |
| N54-C56  | 1.355(19) | N54-C57  | 1.53(2)   |
| C55-H55A | 0.98      | C55-H55B | 0.98      |
| C55-H55C | 0.98      | C57-O58  | 1.259(16) |
| C57-H57  | 0.95      | C56-H56A | 0.98      |
| C56-H56B | 0.98      | C56-H56C | 0.98      |
| N59-C61  | 1.388(19) | N59-C60  | 1.394(18) |

|           |            |           |           |
|-----------|------------|-----------|-----------|
| N59-C62   | 1.40(3)    | C60-H60A  | 0.98      |
| C60-H60B  | 0.98       | C60-H60C  | 0.98      |
| C62-O63   | 1.266(17)  | C62-H62   | 0.95      |
| C61-H61A  | 0.98       | C61-H61B  | 0.98      |
| C61-H61C  | 0.98       | O10W-H10A | 0.920(18) |
| O10W-H10B | 0.888(17)  | O11W-H11B | 0.91(3)   |
| O11W-H11A | 0.847(16)  | C65B-N64B | 1.467(17) |
| C65B-H65A | 0.98       | C65B-H65B | 0.98      |
| C65B-H65C | 0.98       | O68B-C67B | 1.200(18) |
| C66B-N64B | 1.46455(5) | C66B-H66A | 0.98      |
| C66B-H66B | 0.98       | C66B-H66C | 0.98      |
| C67B-N64B | 1.45327(7) | C67B-H67B | 0.95      |
| C65A-N64A | 1.456(17)  | C65A-H65D | 0.98      |
| C65A-H65E | 0.98       | C65A-H65F | 0.98      |
| C67A-O68A | 1.330(19)  | C67A-N64A | 1.372(18) |
| C67A-H67A | 0.95       | N64A-C66A | 1.468(19) |
| C66A-H66D | 0.98       | C66A-H66E | 0.98      |
| C66A-H66F | 0.98       | O12W-H12A | 0.96(2)   |
| O12W-H12B | 0.91(2)    | O13W-H13A | 1.032(16) |
| O13W-H13B | 1.054(15)  |           |           |

**Table S19. Bond angles (°) for Eu-MOF.**

|           |            |           |            |
|-----------|------------|-----------|------------|
| O5-Eu1-O4 | 76.76(12)  | O5-Eu1-O1 | 148.30(14) |
| O4-Eu1-O1 | 76.30(15)  | O5-Eu1-O3 | 74.59(11)  |
| O4-Eu1-O3 | 132.97(12) | O1-Eu1-O3 | 136.92(14) |
| O5-Eu1-O6 | 123.25(11) | O4-Eu1-O6 | 89.31(14)  |
| O1-Eu1-O6 | 72.71(15)  | O3-Eu1-O6 | 76.57(12)  |



|             |            |             |            |
|-------------|------------|-------------|------------|
| O5-Eu1-O9W  | 82.18(19)  | O4-Eu1-O9W  | 72.88(18)  |
| O1-Eu1-O9W  | 74.2(2)    | O3-Eu1-O9W  | 137.05(16) |
| O6-Eu1-O9W  | 145.28(18) | O5-Eu1-O8   | 83.84(14)  |
| O4-Eu1-O8   | 139.76(14) | O1-Eu1-O8   | 106.73(19) |
| O3-Eu1-O8   | 72.20(16)  | O6-Eu1-O8   | 130.47(13) |
| O9W-Eu1-O8  | 69.77(18)  | O5-Eu1-O7   | 131.84(11) |
| O4-Eu1-O7   | 149.43(13) | O1-Eu1-O7   | 73.14(15)  |
| O3-Eu1-O7   | 73.55(13)  | O6-Eu1-O7   | 82.50(13)  |
| O9W-Eu1-O7  | 97.7(2)    | O8-Eu1-O7   | 52.41(13)  |
| O5-Eu1-O5   | 75.51(10)  | O4-Eu1-O5   | 66.52(12)  |
| O1-Eu1-O5   | 108.16(14) | O3-Eu1-O5   | 70.66(11)  |
| O6-Eu1-O5   | 48.99(10)  | O9W-Eu1-O5  | 137.00(17) |
| O8-Eu1-O5   | 141.06(16) | O7-Eu1-O5   | 124.52(12) |
| O5-Eu1-C48  | 107.75(13) | O4-Eu1-C48  | 155.31(14) |
| O1-Eu1-C48  | 90.49(16)  | O3-Eu1-C48  | 70.30(13)  |
| O6-Eu1-C48  | 106.80(13) | O9W-Eu1-C48 | 83.56(18)  |
| O8-Eu1-C48  | 25.98(14)  | O7-Eu1-C48  | 26.44(13)  |
| O5-Eu1-C48  | 138.11(12) | O5-Eu1-C41  | 100.15(12) |
| O4-Eu1-C41  | 75.76(13)  | O1-Eu1-C41  | 89.08(15)  |
| O3-Eu1-C41  | 73.60(12)  | O6-Eu1-C41  | 24.15(11)  |
| O9W-Eu1-C41 | 147.10(16) | O8-Eu1-C41  | 143.07(14) |
| O7-Eu1-C41  | 104.32(13) | O5-Eu1-C41  | 24.94(10)  |
| C48-Eu1-C41 | 125.51(13) | O5-Eu1-Eu1  | 41.59(8)   |
| O4-Eu1-Eu1  | 66.10(9)   | O1-Eu1-Eu1  | 134.75(13) |
| O3-Eu1-Eu1  | 67.65(8)   | O6-Eu1-Eu1  | 82.30(8)   |
| O9W-Eu1-Eu1 | 115.03(18) | O8-Eu1-Eu1  | 118.12(13) |
| O7-Eu1-Eu1  | 140.62(10) | O5-Eu1-Eu1  | 33.91(6)   |

|             |            |             |            |
|-------------|------------|-------------|------------|
| C48-Eu1-Eu1 | 133.33(10) | C41-Eu1-Eu1 | 58.66(8)   |
| O5-Eu1-H9B  | 75.22(8)   | O4-Eu1-H9B  | 50.74(10)  |
| O1-Eu1-H9B  | 74.91(11)  | O3-Eu1-H9B  | 146.50(8)  |
| O6-Eu1-H9B  | 133.45(9)  | O9W-Eu1-H9B | 22.43(15)  |
| O8-Eu1-H9B  | 90.47(11)  | O7-Eu1-H9B  | 118.46(11) |
| O5-Eu1-H9B  | 114.88(6)  | C48-Eu1-H9B | 105.99(10) |
| C41-Eu1-H9B | 126.22(8)  | Eu1-Eu1-H9B | 98.131(8)  |
| C17-S1-C8   | 95.8(2)    | C9-S2-C17   | 95.7(2)    |
| C33-S3-C32  | 96.03(19)  | C32-S4-C34  | 96.24(19)  |
| C1-O1-Eu1   | 171.5(6)   | C1-O2-H2    | 109.5      |
| C16-O3-Eu1  | 134.3(3)   | C16-O4-Eu1  | 141.0(3)   |
| C41-O5-Eu1  | 166.6(3)   | C41-O5-Eu1  | 85.6(3)    |
| Eu1-O5-Eu1  | 104.50(10) | C41-O6-Eu1  | 103.4(3)   |
| C48-O7-Eu1  | 91.9(3)    | C48-O8-Eu1  | 94.0(3)    |
| Eu1-O9W-H9A | 128.9(5)   | Eu1-O9W-H9B | 72.3(3)    |
| H9A-O9W-H9B | 99.4(6)    | O1-C1-O2    | 120.2(8)   |
| O1-C1-C2    | 124.3(7)   | O2-C1-C2    | 115.5(7)   |
| C3-C2-C7    | 118.8(7)   | C3-C2-C1    | 118.2(6)   |
| C7-C2-C1    | 122.8(7)   | C2-C3-C4    | 120.7(5)   |
| C2-C3-H3    | 119.7      | C4-C3-H3    | 119.7      |
| C5-C4-C3    | 121.1(5)   | C5-C4-H4    | 119.5      |
| C3-C4-H4    | 119.5      | C4-C5-C6    | 118.0(5)   |
| C4-C5-C8    | 122.4(5)   | C6-C5-C8    | 119.5(5)   |
| C7-C6-C5    | 121.0(7)   | C7-C6-H6    | 119.5      |
| C5-C6-H6    | 119.5      | C6-C7-C2    | 120.1(9)   |
| C6-C7-H7    | 120.0      | C2-C7-H7    | 120.0      |
| C9-C8-C5    | 127.1(4)   | C9-C8-S1    | 116.0(3)   |

|             |          |             |          |
|-------------|----------|-------------|----------|
| C5-C8-S1    | 116.7(3) | C8-C9-C10   | 128.8(4) |
| C8-C9-S2    | 117.1(3) | C10-C9-S2   | 113.9(3) |
| C11-C10-C15 | 119.2(4) | C11-C10-C9  | 122.2(4) |
| C15-C10-C9  | 118.4(4) | C10-C11-C12 | 119.9(4) |
| C10-C11-H11 | 120.1    | C12-C11-H11 | 120.1    |
| C13-C12-C11 | 120.5(4) | C13-C12-H12 | 119.8    |
| C11-C12-H12 | 119.8    | C12-C13-C14 | 119.8(4) |
| C12-C13-C16 | 121.1(4) | C14-C13-C16 | 119.1(4) |
| C13-C14-C15 | 120.3(5) | C13-C14-H14 | 119.8    |
| C15-C14-H14 | 119.8    | C10-C15-C14 | 120.3(5) |
| C10-C15-H15 | 119.9    | C14-C15-H15 | 119.9    |
| O4-C16-O3   | 127.5(4) | O4-C16-C13  | 115.1(4) |
| O3-C16-C13  | 117.4(4) | C18-C17-S1  | 124.4(3) |
| C18-C17-S2  | 123.9(3) | S1-C17-S2   | 111.6(2) |
| C17-C18-C19 | 123.1(4) | C17-C18-C27 | 122.6(4) |
| C19-C18-C27 | 113.8(3) | C20-C19-C24 | 119.5(4) |
| C20-C19-C18 | 123.1(4) | C24-C19-C18 | 117.4(4) |
| C21-C20-C19 | 120.4(4) | C21-C20-H20 | 119.8    |
| C19-C20-H20 | 119.8    | C22-C21-C20 | 119.9(4) |
| C22-C21-H21 | 120.0    | C20-C21-H21 | 120.0    |
| C21-C22-C23 | 120.2(4) | C21-C22-H22 | 119.9    |
| C23-C22-H22 | 119.9    | C22-C23-C24 | 120.6(4) |
| C22-C23-H23 | 119.7    | C24-C23-H23 | 119.7    |
| C23-C24-C19 | 119.3(4) | C23-C24-C25 | 123.8(4) |
| C19-C24-C25 | 116.9(3) | C32-C25-C24 | 122.4(3) |
| C32-C25-C26 | 122.9(4) | C24-C25-C26 | 114.3(3) |
| C31-C26-C27 | 118.9(4) | C31-C26-C25 | 123.8(4) |

|             |          |             |          |
|-------------|----------|-------------|----------|
| C27-C26-C25 | 117.2(4) | C28-C27-C26 | 119.7(4) |
| C28-C27-C18 | 123.4(4) | C26-C27-C18 | 116.9(3) |
| C29-C28-C27 | 120.5(4) | C29-C28-H28 | 119.8    |
| C27-C28-H28 | 119.8    | C30-C29-C28 | 120.1(4) |
| C30-C29-H29 | 120.0    | C28-C29-H29 | 120.0    |
| C29-C30-C31 | 120.1(4) | C29-C30-H30 | 120.0    |
| C31-C30-H30 | 120.0    | C30-C31-C26 | 120.8(4) |
| C30-C31-H31 | 119.6    | C26-C31-H31 | 119.6    |
| C25-C32-S4  | 123.7(3) | C25-C32-S3  | 124.1(3) |
| S4-C32-S3   | 112.0(2) | C34-C33-C35 | 124.8(4) |
| C34-C33-S3  | 116.7(3) | C35-C33-S3  | 118.4(3) |
| C33-C34-C42 | 126.6(4) | C33-C34-S4  | 117.0(3) |
| C42-C34-S4  | 116.4(3) | C36-C35-C40 | 119.2(4) |
| C36-C35-C33 | 119.9(4) | C40-C35-C33 | 120.8(4) |
| C37-C36-C35 | 120.6(4) | C37-C36-H36 | 119.7    |
| C35-C36-H36 | 119.7    | C36-C37-C38 | 120.1(4) |
| C36-C37-H37 | 119.9    | C38-C37-H37 | 119.9    |
| C39-C38-C37 | 119.6(4) | C39-C38-C41 | 121.7(4) |
| C37-C38-C41 | 118.7(4) | C38-C39-C40 | 120.4(4) |
| C38-C39-H39 | 119.8    | C40-C39-H39 | 119.8    |
| C39-C40-C35 | 119.8(4) | C39-C40-H40 | 120.1    |
| C35-C40-H40 | 120.1    | O6-C41-O5   | 121.6(4) |
| O6-C41-C38  | 118.6(4) | O5-C41-C38  | 119.8(4) |
| O6-C41-Eu1  | 52.5(2)  | O5-C41-Eu1  | 69.4(2)  |
| C38-C41-Eu1 | 169.0(3) | C47-C42-C43 | 119.3(4) |
| C47-C42-C34 | 120.7(4) | C43-C42-C34 | 120.0(4) |
| C44-C43-C42 | 119.8(4) | C44-C43-H43 | 120.1    |

|               |           |               |           |
|---------------|-----------|---------------|-----------|
| C42-C43-H43   | 120.1     | C43-C44-C45   | 120.5(4)  |
| C43-C44-H44   | 119.8     | C45-C44-H44   | 119.8     |
| C46-C45-C44   | 119.6(4)  | C46-C45-C48   | 120.4(4)  |
| C44-C45-C48   | 120.0(4)  | C45-C46-C47   | 120.4(4)  |
| C45-C46-H46   | 119.8     | C47-C46-H46   | 119.8     |
| C46-C47-C42   | 120.3(4)  | C46-C47-H47   | 119.9     |
| C42-C47-H47   | 119.9     | O8-C48-O7     | 121.6(4)  |
| O8-C48-C45    | 119.2(4)  | O7-C48-C45    | 119.2(4)  |
| O8-C48-Eu1    | 60.0(2)   | O7-C48-Eu1    | 61.7(2)   |
| C45-C48-Eu1   | 175.6(3)  | C50-N49-C52   | 130.5(18) |
| C50-N49-C51   | 123.2(18) | C52-N49-C51   | 106.3(19) |
| N49-C50-H50A  | 109.5     | N49-C50-H50B  | 109.5     |
| H50A-C50-H50B | 109.5     | N49-C50-H50C  | 109.5     |
| H50A-C50-H50C | 109.5     | H50B-C50-H50C | 109.5     |
| N49-C51-H51A  | 109.5     | N49-C51-H51B  | 109.5     |
| H51A-C51-H51B | 109.5     | N49-C51-H51C  | 109.5     |
| H51A-C51-H51C | 109.5     | H51B-C51-H51C | 109.5     |
| O53-C52-N49   | 115.2(19) | O53-C52-H52   | 122.4     |
| N49-C52-H52   | 122.4     | C55-N54-C56   | 124.2(16) |
| C55-N54-C57   | 115.4(15) | C56-N54-C57   | 120.3(13) |
| N54-C55-H55A  | 109.5     | N54-C55-H55B  | 109.5     |
| H55A-C55-H55B | 109.5     | N54-C55-H55C  | 109.5     |
| H55A-C55-H55C | 109.5     | H55B-C55-H55C | 109.5     |
| O58-C57-N54   | 98.2(15)  | O58-C57-H57   | 130.9     |
| N54-C57-H57   | 130.9     | N54-C56-H56A  | 109.5     |
| N54-C56-H56B  | 109.5     | H56A-C56-H56B | 109.5     |
| N54-C56-H56C  | 109.5     | H56A-C56-H56C | 109.5     |

|                    |            |                    |           |
|--------------------|------------|--------------------|-----------|
| H56B-C56-H56C      | 109.5      | C61-N59-C60        | 119.(2)   |
| C61-N59-C62        | 97.(2)     | C60-N59-C62        | 142.(2)   |
| N59-C60-H60A       | 109.5      | N59-C60-H60B       | 109.5     |
| H60A-C60-H60B      | 109.5      | N59-C60-H60C       | 109.5     |
| H60A-C60-H60C      | 109.5      | H60B-C60-H60C      | 109.5     |
| O63-C62-N59        | 93.(2)     | O63-C62-H62        | 133.7     |
| N59-C62-H62        | 133.7      | N59-C61-H61A       | 109.5     |
| N59-C61-H61B       | 109.5      | H61A-C61-H61B      | 109.5     |
| N59-C61-H61C       | 109.5      | H61A-C61-H61C      | 109.5     |
| H61B-C61-H61C      | 109.5      | H10A-O10W-<br>H10B | 130.(2)   |
| H11B-O11W-<br>H11A | 110.(2)    | N64B-C65B-H65A     | 109.5     |
| N64B-C65B-H65B     | 109.5      | H65A-C65B-H65B     | 109.5     |
| N64B-C65B-H65C     | 109.5      | H65A-C65B-H65C     | 109.5     |
| H65B-C65B-H65C     | 109.5      | N64B-C66B-H66A     | 109.5     |
| N64B-C66B-H66B     | 109.5      | H66A-C66B-H66B     | 109.5     |
| N64B-C66B-H66C     | 109.5      | H66A-C66B-H66C     | 109.5     |
| H66B-C66B-H66C     | 109.5      | O68B-C67B-N64B     | 131.2(15) |
| O68B-C67B-H67B     | 114.4      | N64B-C67B-H67B     | 114.4     |
| C67B-N64B-C66B     | 130.853(3) | C67B-N64B-C65B     | 123.0(15) |
| C66B-N64B-C65B     | 104.9(15)  | N64A-C65A-H65D     | 109.5     |
| N64A-C65A-H65E     | 109.5      | H65D-C65A-H65E     | 109.5     |
| N64A-C65A-H65F     | 109.5      | H65D-C65A-H65F     | 109.5     |
| H65E-C65A-H65F     | 109.5      | O68A-C67A-N64A     | 121.(3)   |
| O68A-C67A-H67A     | 119.3      | N64A-C67A-H67A     | 119.3     |
| C67A-N64A-C65A     | 135.(3)    | C67A-N64A-C66A     | 117.(2)   |
| C65A-N64A-C66A     | 102.(2)    | N64A-C66A-H66D     | 109.5     |

|                    |           |                    |         |
|--------------------|-----------|--------------------|---------|
| N64A-C66A-H66E     | 109.5     | H66D-C66A-H66E     | 109.5   |
| N64A-C66A-H66F     | 109.5     | H66D-C66A-H66F     | 109.5   |
| H66E-C66A-H66F     | 109.5     | H12A-O12W-<br>H12B | 125.(2) |
| H13A-O13W-<br>H13B | 119.1(15) |                    |         |

**Table S20. Anisotropic atomic displacement parameters ( $\text{\AA}^2$ ) for Eu-MOF.**

The anisotropic atomic displacement factor exponent takes the form: -  
 $2\pi^2 [ h^2 a^{*2} U_{11} + \dots + 2 h k a^* b^* U_{12} ]$

|     | $U_{11}$    | $U_{22}$    | $U_{33}$    | $U_{23}$   | $U_{13}$   | $U_{12}$   |
|-----|-------------|-------------|-------------|------------|------------|------------|
| Eu1 | 0.01788(10) | 0.01817(11) | 0.01358(10) | -          | -          | -          |
| S1  | 0.0210(5)   | 0.0520(7)   | 0.0369(6)   | -0.0327(6) | 0.0069(4)  | -0.0140(5) |
| S2  | 0.0219(5)   | 0.0321(5)   | 0.0249(5)   | -0.0165(4) | 0.0021(4)  | -0.0073(4) |
| S3  | 0.0162(4)   | 0.0229(5)   | 0.0230(5)   | -0.0007(4) | -0.0045(3) | -0.0054(3) |
| S4  | 0.0165(4)   | 0.0213(4)   | 0.0228(5)   | 0.0006(4)  | -0.0043(3) | -0.0073(3) |
| O1  | 0.053(2)    | 0.076(3)    | 0.055(3)    | -0.050(2)  | -0.007(2)  | -0.012(2)  |
| O2  | 0.208(8)    | 0.189(7)    | 0.193(7)    | -0.108(6)  | -0.121(6)  | 0.016(6)   |
| O3  | 0.0250(15)  | 0.0411(18)  | 0.0305(16)  | -          | 0.0067(12) | -          |
| O4  | 0.0328(18)  | 0.044(2)    | 0.049(2)    | -          | 0.0215(16) | -          |
| O5  | 0.0241(15)  | 0.0403(18)  | 0.0174(13)  | -          | -          | -          |
| O6  | 0.047(2)    | 0.0273(16)  | 0.0278(16)  | -          | -          | -          |
| O7  | 0.063(3)    | 0.056(2)    | 0.0220(16)  | -          | 0.0001(16) | -0.045(2)  |
| O8  | 0.034(2)    | 0.071(3)    | 0.044(2)    | 0.030(2)   | -          | -0.033(2)  |

|     | U <sub>11</sub> | U <sub>22</sub> | U <sub>33</sub> | U <sub>23</sub>         | U <sub>13</sub>         | U <sub>12</sub>         |
|-----|-----------------|-----------------|-----------------|-------------------------|-------------------------|-------------------------|
| O9W | 0.088(4)        | 0.043(3)        | 0.068(3)        | -0.004(2)               | -0.008(3)               | 0.022(3)                |
| C1  | 0.079(5)        | 0.089(5)        | 0.101(6)        | -0.068(5)               | -0.055(4)               | 0.029(4)                |
| C2  | 0.058(4)        | 0.079(5)        | 0.097(6)        | -0.072(5)               | -0.046(4)               | 0.027(4)                |
| C3  | 0.043(3)        | 0.049(3)        | 0.048(3)        | -0.034(3)               | -0.009(2)               | -0.009(2)               |
| C4  | 0.043(3)        | 0.037(3)        | 0.047(3)        | -0.028(2)               | -0.010(2)               | -0.002(2)               |
| C5  | 0.028(2)        | 0.049(3)        | 0.043(3)        | -0.033(2)               | -0.006(2)               | -0.004(2)               |
| C6  | 0.090(5)        | 0.085(5)        | 0.109(6)        | -0.081(5)               | -0.056(4)               | 0.028(4)                |
| C7  | 0.094(3)        | 0.090(3)        | 0.091(3)        | -0.039(2)               | <sup>-</sup> 0.0183(19) | <sup>-</sup> 0.0153(19) |
| C8  | 0.024(2)        | 0.041(2)        | 0.029(2)        | -0.025(2)               | 0.0024(17)              | <sup>-</sup> 0.0085(18) |
| C9  | 0.025(2)        | 0.033(2)        | 0.026(2)        | <sup>-</sup> 0.0162(18) | 0.0038(16)              | <sup>-</sup> 0.0104(17) |
| C10 | 0.0235(19)      | 0.032(2)        | 0.0220(19)      | <sup>-</sup> 0.0154(17) | 0.0036(15)              | <sup>-</sup> 0.0081(16) |
| C11 | 0.045(3)        | 0.033(2)        | 0.039(3)        | -0.020(2)               | 0.021(2)                | -0.020(2)               |
| C12 | 0.041(3)        | 0.030(2)        | 0.041(3)        | -0.021(2)               | 0.018(2)                | -0.015(2)               |
| C13 | 0.0221(19)      | 0.033(2)        | 0.024(2)        | <sup>-</sup> 0.0154(17) | 0.0047(15)              | <sup>-</sup> 0.0092(16) |
| C14 | 0.062(4)        | 0.035(3)        | 0.034(3)        | -0.017(2)               | 0.022(3)                | -0.021(3)               |
| C15 | 0.057(3)        | 0.030(2)        | 0.037(3)        | -0.020(2)               | 0.016(2)                | -0.012(2)               |
| C16 | 0.0219(19)      | 0.030(2)        | 0.027(2)        | <sup>-</sup> 0.0124(18) | 0.0049(16)              | <sup>-</sup> 0.0060(16) |
| C17 | 0.0208(18)      | 0.0254(19)      | 0.0237(19)      | <sup>-</sup> 0.0125(16) | 0.0042(15)              | <sup>-</sup> 0.0099(15) |
| C18 | 0.0221(18)      | 0.0208(18)      | 0.0198(18)      | <sup>-</sup> 0.0083(15) | 0.0030(14)              | <sup>-</sup> 0.0102(15) |
| C19 | 0.0218(18)      | 0.0233(19)      | 0.0151(16)      | <sup>-</sup> 0.0055(14) | 0.0006(14)              | <sup>-</sup> 0.0097(15) |
| C20 | 0.032(2)        | 0.0218(19)      | 0.029(2)        | <sup>-</sup> 0.0084(17) | <sup>-</sup> 0.0047(17) | <sup>-</sup> 0.0059(17) |



|     | <b>U<sub>11</sub></b> | <b>U<sub>22</sub></b> | <b>U<sub>33</sub></b> | <b>U<sub>23</sub></b> | <b>U<sub>13</sub></b> | <b>U<sub>12</sub></b> |
|-----|-----------------------|-----------------------|-----------------------|-----------------------|-----------------------|-----------------------|
| C21 | 0.032(2)              | 0.025(2)              | 0.036(2)              | -<br>0.0088(18)       | -<br>0.0116(19)       | -<br>0.0010(17)       |
| C22 | 0.029(2)              | 0.029(2)              | 0.030(2)              | -<br>0.0057(18)       | -<br>0.0116(18)       | -<br>0.0052(17)       |
| C23 | 0.026(2)              | 0.0223(19)            | 0.0235(19)            | -<br>0.0064(15)       | -<br>0.0060(15)       | -<br>0.0073(16)       |
| C24 | 0.0215(18)            | 0.0206(18)            | 0.0152(16)            | -<br>0.0055(14)       | -<br>0.0017(13)       | -<br>0.0074(14)       |
| C25 | 0.0179(17)            | 0.0198(17)            | 0.0177(17)            | -<br>0.0065(14)       | -<br>0.0025(13)       | -<br>0.0068(14)       |
| C26 | 0.0204(18)            | 0.0238(18)            | 0.0170(17)            | -<br>0.0073(14)       | 0.0000(14)            | -<br>0.0102(15)       |
| C27 | 0.0243(19)            | 0.027(2)              | 0.0194(18)            | -<br>0.0119(16)       | 0.0043(15)            | -<br>0.0127(16)       |
| C28 | 0.031(2)              | 0.033(2)              | 0.035(2)              | -<br>0.0186(19)       | 0.0103(18)            | -<br>0.0188(19)       |
| C29 | 0.029(2)              | 0.053(3)              | 0.047(3)              | -0.031(3)             | 0.017(2)              | -0.025(2)             |
| C30 | 0.025(2)              | 0.044(3)              | 0.043(3)              | -0.028(2)             | 0.0098(19)            | -0.014(2)             |
| C31 | 0.024(2)              | 0.026(2)              | 0.026(2)              | -<br>0.0131(17)       | 0.0014(16)            | -<br>0.0087(16)       |
| C32 | 0.0143(16)            | 0.0214(18)            | 0.0187(17)            | -<br>0.0061(14)       | -<br>0.0031(13)       | -<br>0.0053(14)       |
| C33 | 0.0252(19)            | 0.0201(18)            | 0.0175(17)            | 0.0014(14)            | -<br>0.0068(15)       | -<br>0.0087(15)       |
| C34 | 0.0233(19)            | 0.0212(18)            | 0.0157(17)            | 0.0001(14)            | -<br>0.0047(14)       | -<br>0.0086(15)       |
| C35 | 0.0214(18)            | 0.0246(19)            | 0.0180(18)            | -<br>0.0019(15)       | -<br>0.0067(14)       | -<br>0.0049(15)       |
| C36 | 0.035(2)              | 0.026(2)              | 0.027(2)              | -<br>0.0051(17)       | -<br>0.0174(18)       | -<br>0.0082(18)       |
| C37 | 0.036(2)              | 0.0222(19)            | 0.027(2)              | -<br>0.0048(17)       | -<br>0.0166(18)       | -<br>0.0062(17)       |

|     | $U_{11}$   | $U_{22}$   | $U_{33}$   | $U_{23}$   | $U_{13}$   | $U_{12}$   |
|-----|------------|------------|------------|------------|------------|------------|
| C38 | 0.0218(18) | 0.0255(19) | 0.0186(18) | -          | -          | -          |
|     |            |            |            | 0.0053(15) | 0.0075(14) | 0.0041(15) |
| C39 | 0.025(2)   | 0.034(2)   | 0.0206(19) | -          | -          | -          |
|     |            |            |            | 0.0009(17) | 0.0089(16) | 0.0125(17) |
| C40 | 0.026(2)   | 0.029(2)   | 0.0223(19) | -          | -          | -          |
|     |            |            |            | 0.0014(16) | 0.0061(16) | 0.0127(17) |
| C41 | 0.0236(19) | 0.028(2)   | 0.0177(18) | -          | -          | -          |
|     |            |            |            | 0.0062(16) | 0.0071(15) | 0.0022(16) |
| C42 | 0.0223(19) | 0.0224(19) | 0.0196(18) | -          | -          | -          |
|     |            |            |            | 0.0016(15) | 0.0027(15) | 0.0082(15) |
| C43 | 0.042(3)   | 0.049(3)   | 0.021(2)   | -          | -          | -0.032(2)  |
|     |            |            |            | 0.0064(19) | 0.0012(18) |            |
| C44 | 0.051(3)   | 0.050(3)   | 0.020(2)   | -0.004(2)  | -0.001(2)  | -0.034(3)  |
| C45 | 0.028(2)   | 0.024(2)   | 0.025(2)   | -          | -          | -          |
|     |            |            |            | 0.0014(16) | 0.0008(16) | 0.0122(17) |
| C46 | 0.029(2)   | 0.038(2)   | 0.027(2)   | 0.0014(19) | -          | -          |
|     |            |            |            |            | 0.0084(18) | 0.0199(19) |
| C47 | 0.030(2)   | 0.039(2)   | 0.0201(19) | 0.0008(18) | -          | -          |
|     |            |            |            |            | 0.0080(16) | 0.0177(19) |
| C48 | 0.031(2)   | 0.025(2)   | 0.029(2)   | -          | 0.0002(18) | -          |
|     |            |            |            | 0.0003(17) |            | 0.0132(18) |
| N49 | 0.049(4)   | 0.085(5)   | 0.094(5)   | -0.010(4)  | -0.011(4)  | -0.037(4)  |
| C50 | 0.063(6)   | 0.075(7)   | 0.108(8)   | -0.004(7)  | -0.008(7)  | -0.042(6)  |
| C51 | 0.061(7)   | 0.097(8)   | 0.111(8)   | -0.013(7)  | 0.002(7)   | -0.023(6)  |
| C52 | 0.062(4)   | 0.086(4)   | 0.093(5)   | -0.017(3)  | -0.012(3)  | -0.034(3)  |
| O53 | 0.056(5)   | 0.099(6)   | 0.109(6)   | -0.007(5)  | -0.027(4)  | -0.031(4)  |
| N54 | 0.058(4)   | 0.058(4)   | 0.075(4)   | -0.044(3)  | 0.005(3)   | 0.001(3)   |
| C55 | 0.066(6)   | 0.066(6)   | 0.068(6)   | -0.036(5)  | 0.013(5)   | -0.006(5)  |
| C57 | 0.064(4)   | 0.064(4)   | 0.077(4)   | -0.036(3)  | 0.001(3)   | -0.004(3)  |
| C56 | 0.048(5)   | 0.056(5)   | 0.095(6)   | -0.063(4)  | -0.006(5)  | 0.001(4)   |
| O58 | 0.121(6)   | 0.102(6)   | 0.131(7)   | -0.034(5)  | 0.007(6)   | 0.007(5)   |

|      | $U_{11}$  | $U_{22}$  | $U_{33}$  | $U_{23}$  | $U_{13}$   | $U_{12}$  |
|------|-----------|-----------|-----------|-----------|------------|-----------|
| N59  | 0.112(7)  | 0.153(9)  | 0.075(5)  | -0.035(6) | -0.029(5)  | -0.012(7) |
| C60  | 0.096(9)  | 0.152(11) | 0.060(7)  | -0.039(8) | -0.018(7)  | -0.024(9) |
| C62  | 0.109(7)  | 0.153(9)  | 0.072(6)  | -0.037(7) | -0.032(5)  | -0.011(7) |
| C61  | 0.132(8)  | 0.149(9)  | 0.104(7)  | -0.032(7) | -0.022(6)  | -0.017(7) |
| O63  | 0.110(8)  | 0.162(10) | 0.077(6)  | -0.028(7) | -0.024(6)  | -0.002(8) |
| O10W | 0.043(5)  | 0.054(5)  | 0.046(5)  | -0.015(4) | -0.002(3)  | -0.015(4) |
| O11W | 0.017(6)  | 0.090(12) | 0.068(11) | 0.007(9)  | -0.019(7)  | -0.014(7) |
| C65B | 0.124(7)  | 0.115(7)  | 0.121(7)  | -0.046(5) | -0.016(5)  | -0.027(5) |
| O68B | 0.117(6)  | 0.101(6)  | 0.105(6)  | -0.053(4) | -0.012(4)  | -0.032(4) |
| C66B | 0.122(6)  | 0.115(6)  | 0.119(6)  | -0.044(4) | -0.015(4)  | -0.028(4) |
| C67B | 0.118(5)  | 0.111(5)  | 0.115(5)  | -0.045(3) | -0.013(2)  | -0.029(3) |
| N64B | 0.118(5)  | 0.111(5)  | 0.116(5)  | -0.044(3) | -0.013(2)  | -0.029(2) |
| C65A | 0.117(6)  | 0.107(6)  | 0.111(6)  | -0.047(4) | -0.011(4)  | -0.029(4) |
| C67A | 0.118(5)  | 0.110(5)  | 0.115(5)  | -0.045(3) | -0.014(2)  | -0.030(2) |
| N64A | 0.118(5)  | 0.110(5)  | 0.115(5)  | -0.046(3) | -0.013(2)  | -0.030(3) |
| C66A | 0.120(6)  | 0.108(6)  | 0.113(6)  | -0.047(4) | -0.015(4)  | -0.032(4) |
| O68A | 0.124(6)  | 0.113(6)  | 0.121(6)  | -0.046(4) | -0.015(4)  | -0.029(4) |
| O12W | 0.099(15) | 0.037(9)  | 0.057(11) | -0.018(7) | -0.012(10) | -0.014(9) |
| O13W | 0.078(8)  | 0.068(7)  | 0.113(10) | -0.012(7) | -0.050(7)  | 0.019(6)  |

**Table S21. Hydrogen atomic coordinates and isotropic atomic displacement parameters ( $\text{\AA}^2$ ) for Eu-MOF.**

|     | $x/a$   | $y/b$  | $z/c$   | $U(\text{eq})$ |
|-----|---------|--------|---------|----------------|
| H2  | -0.0892 | 0.3219 | 0.0624  | 0.274          |
| H9A | -0.1395 | 0.3078 | -0.0229 | 0.097          |
| H9B | -0.1495 | 0.2174 | -0.0076 | 0.097          |

|      | <b>x/a</b> | <b>y/b</b> | <b>z/c</b> | <b>U(eq)</b> |
|------|------------|------------|------------|--------------|
| H3   | 0.1872     | 0.0837     | 0.1662     | 0.049        |
| H4   | 0.3038     | 0.0377     | 0.2620     | 0.047        |
| H6   | 0.1458     | 0.2851     | 0.2916     | 0.101        |
| H7   | 0.0416     | 0.3351     | 0.1900     | 0.108        |
| H11  | 0.5319     | -0.0509    | 0.3000     | 0.047        |
| H12  | 0.6743     | -0.0745    | 0.2000     | 0.045        |
| H14  | 0.6972     | 0.1922     | 0.1300     | 0.054        |
| H15  | 0.5502     | 0.2186     | 0.2266     | 0.051        |
| H20  | 0.5953     | 0.0614     | 0.5342     | 0.033        |
| H21  | 0.7713     | 0.0776     | 0.5598     | 0.038        |
| H22  | 0.7754     | 0.2206     | 0.5626     | 0.036        |
| H23  | 0.6070     | 0.3491     | 0.5360     | 0.028        |
| H28  | 0.1623     | 0.1563     | 0.5660     | 0.036        |
| H29  | -0.0077    | 0.2499     | 0.6137     | 0.047        |
| H30  | -0.0032    | 0.3965     | 0.6084     | 0.041        |
| H31  | 0.1722     | 0.4497     | 0.5564     | 0.029        |
| H36  | 0.3675     | 0.7831     | 0.2943     | 0.034        |
| H37  | 0.2819     | 0.9128     | 0.1973     | 0.033        |
| H39  | 0.0804     | 0.7637     | 0.1747     | 0.033        |
| H40  | 0.1676     | 0.6324     | 0.2715     | 0.031        |
| H43  | 0.4944     | 0.6308     | 0.1930     | 0.041        |
| H44  | 0.6199     | 0.7177     | 0.1028     | 0.045        |
| H46  | 0.7901     | 0.7107     | 0.2618     | 0.038        |
| H47  | 0.6571     | 0.6325     | 0.3526     | 0.036        |
| H50A | -0.1091    | 0.0439     | 0.2478     | 0.128        |
| H50B | 0.0222     | -0.0183    | 0.2717     | 0.128        |

|      | <b>x/a</b> | <b>y/b</b> | <b>z/c</b> | <b>U(eq)</b> |
|------|------------|------------|------------|--------------|
| H50C | -0.0946    | -0.0586    | 0.3095     | 0.128        |
| H51A | -0.1531    | 0.1382     | 0.3804     | 0.148        |
| H51B | -0.1206    | 0.1716     | 0.2923     | 0.148        |
| H51C | -0.2370    | 0.1308     | 0.3304     | 0.148        |
| H52  | -0.0507    | 0.0331     | 0.4398     | 0.097        |
| H55A | -0.1629    | 0.3318     | 0.4083     | 0.104        |
| H55B | -0.0299    | 0.2797     | 0.4335     | 0.104        |
| H55C | -0.1150    | 0.3618     | 0.4628     | 0.104        |
| H57  | -0.1889    | 0.4311     | 0.2905     | 0.083        |
| H56A | 0.0662     | 0.4716     | 0.3171     | 0.088        |
| H56B | 0.0353     | 0.4524     | 0.4042     | 0.088        |
| H56C | 0.1204     | 0.3703     | 0.3749     | 0.088        |
| H60A | -0.5972    | 0.1828     | 0.0452     | 0.153        |
| H60B | -0.5852    | 0.2165     | 0.1089     | 0.153        |
| H60C | -0.6716    | 0.2852     | 0.0462     | 0.153        |
| H62  | -0.3216    | 0.2774     | -0.0516    | 0.137        |
| H61A | -0.4086    | 0.3667     | -0.0137    | 0.203        |
| H61B | -0.5513    | 0.4023     | 0.0085     | 0.203        |
| H61C | -0.4650    | 0.3336     | 0.0713     | 0.203        |
| H10A | 0.5327     | 1.0257     | -0.1193    | 0.058        |
| H10B | 0.4906     | 0.9807     | -0.0305    | 0.058        |
| H11B | 0.4446     | 0.9770     | -0.0384    | 0.08         |
| H11A | 0.4891     | 0.9943     | 0.0158     | 0.08         |
| H65A | 0.7032     | 0.4675     | 0.1393     | 0.178        |
| H65B | 0.6311     | 0.4139     | 0.1174     | 0.178        |
| H65C | 0.5636     | 0.5138     | 0.1256     | 0.178        |

|      | <b>x/a</b> | <b>y/b</b> | <b>z/c</b> | <b>U(eq)</b> |
|------|------------|------------|------------|--------------|
| H66A | 0.7557     | 0.4143     | 0.2259     | 0.177        |
| H66B | 0.6732     | 0.4005     | 0.3041     | 0.177        |
| H66C | 0.7301     | 0.3141     | 0.2750     | 0.177        |
| H67B | 0.4426     | 0.3695     | 0.2149     | 0.136        |
| H65D | 0.2836     | 0.4331     | 0.2714     | 0.163        |
| H65E | 0.3467     | 0.3234     | 0.2902     | 0.163        |
| H65F | 0.3361     | 0.3719     | 0.3490     | 0.163        |
| H67A | 0.6020     | 0.3138     | 0.3239     | 0.134        |
| H66D | 0.3547     | 0.4926     | 0.1868     | 0.165        |
| H66E | 0.4846     | 0.5138     | 0.1723     | 0.165        |
| H66F | 0.4716     | 0.4284     | 0.1544     | 0.165        |
| H12A | 0.1061     | 0.4717     | 0.0144     | 0.077        |
| H12B | -0.0398    | 0.5022     | 0.0032     | 0.077        |
| H13A | -0.1033    | 0.4216     | -0.1530    | 0.115        |
| H13B | 0.0313     | 0.4638     | -0.1798    | 0.115        |
